1 **Localized phosphorylation of RNA Polymerase II by G1 cyclin-Cdk promotes cell**  
2 **cycle entry**

3  
4 Mardo Kõivomägi<sup>1</sup>, Matthew P. Swaffer<sup>1</sup>, Jonathan J. Turner<sup>1</sup>, Georgi Marinov<sup>2</sup> & Jan M.  
5 Skotheim<sup>1</sup>

6  
7 <sup>1</sup>Department of Biology, Stanford University, Stanford CA 94305, USA

8 <sup>2</sup>Department of Genetics, Stanford University, Stanford CA, 94305, USA  
9  
10

11 **Abstract**

12  
13 The cell cycle is thought to be initiated by cyclin-dependent kinases (Cdk) inactivating  
14 transcriptional inhibitors of cell cycle gene-expression(1, 2). In budding yeast, the G1  
15 cyclin Cln3-Cdk1 complex is thought to directly phosphorylate Whi5, thereby releasing the  
16 transcription factor SBF and committing cells to division(3-7). Here, we report that Cln3-  
17 Cdk1 does not phosphorylate Whi5, but instead phosphorylates the RNA Polymerase II  
18 subunit Rpb1's C-terminal domain (CTD) on S<sub>5</sub> of its heptapeptide repeats. Cln3-Cdk1  
19 binds SBF-regulated promoters(8) and Cln3's function can be performed by the canonical  
20 S<sub>5</sub> kinase(9) Ccl1-Kin28 when synthetically recruited to SBF. Thus, Cln3-Cdk1 triggers  
21 cell division by phosphorylating Rpb1 at SBF-regulated promoters to activate transcription.  
22 Our findings blur the distinction between cell cycle and transcriptional Cdks to highlight  
23 the ancient relationship between these processes.

24 The eukaryotic cell cycle is driven by a series of cyclin-Cdk complexes that promote cell  
25 cycle progression by phosphorylating key substrates(2). The first step of the eukaryotic  
26 cell cycle, from G1 to S phase, has long been thought to require the phosphorylation and  
27 inactivation of a transcriptional inhibitor. In human cells, cyclin D-Cdk4,6 phosphorylates  
28 the retinoblastoma protein, Rb, and in budding yeast Cln3-Cdk1 is thought to  
29 phosphorylate Whi5(1, 3, 4). This results in the activation of the E2F and SBF transcription  
30 factors, in animal and yeast cells respectively, which then commits cells to division via  
31 positive feedback loops (Fig. 1A)(5, 10-15). However, in early to mid G1, cyclin D-Cdk4,6  
32 constitutively hypo-phosphorylates Rb(16), which is likely insufficient to completely  
33 inactivate Rb(17). As for Whi5, phosphorylation by Cln3-Cdk1 has not previously been  
34 observed *in vivo*. Thus, key mechanistic aspects of the eukaryotic G1/S transition model  
35 remain either unknown or untested.

36  
37 To examine the prevailing model that Cln3-Cdk1 promotes the G1/S transition by  
38 progressively phosphorylating and inhibiting Whi5(3, 4), we sought to measure Whi5  
39 phosphorylation *in vivo* as cells progressed through G1. We used Phos-tag-supplemented  
40 SDS-PAGE(18) to separate distinct phospho-isoforms of Whi5 isolated from cells  
41 synchronously released from G1 arrest. This allowed us to resolve not only multi-  
42 phosphorylated species of Whi5 but also different mono- or di-phosphorylated species,  
43 which had never previously been observed (Fig. 1B). Hypophosphorylation of Whi5 is  
44 slightly reduced upon release from pheromone arrest, but stays at a constant level until  
45 the G1/S transition. At G1/S, Whi5 is rapidly hyper-phosphorylated by Cln1/2-Cdk1(3, 6).

46  
47 Next, we sought to test if Whi5 hypophosphorylation in early G1 is due to Cln3-  
48 Cdk1. Consistent with Cln3's well-established role in driving G1/S, Whi5  
49 hyperphosphorylation was delayed in *cln3Δ* cells synchronously released into the cell  
50 cycle as previously reported(19) (Fig. 1C). But, critically, the hypophosphorylation pattern  
51 was the same as in WT cells in early- to mid-G1, a time when Cln3 is constitutively  
52 expressed and thought to function(7, 20). Furthermore, the hypophosphorylation pattern  
53 was unaffected by conditionally expressing *CLN3* in G1-arrested *cln3Δbck2Δ* cells, or by  
54 inhibiting an ATP analog-sensitive Cdk1 (Cdk1<sup>as</sup>) in mid-G1 (fig. S1A to C). In contrast,  
55 inhibiting Cdk1<sup>as</sup> in S/G2, after Whi5 was already hyperphosphorylated, caused rapid Whi5  
56 dephosphorylation back to the same G1 hypophosphorylated isoforms (fig. S1D). Taken  
57 together, these experiments argue strongly against the prevailing model that Cln3-Cdk1  
58 phosphorylates Whi5 to drive G1/S. Rather, they raise the possibility that Cln3 and Whi5  
59 act as separate inputs regulating SBF activity. Consistent with this separate input model,  
60 *cln3Δwhi5Δ* cells were larger than *whi5Δ* cells(3, 4), and addition of a hyperactive *CLN3*  
61 allele (*CLN3ΔC*)(21, 22) reduced cell size more than *whi5Δ* (Fig. 1D).

62  
63 If Cln3-Cdk1 functions through SBF but does not target Whi5, it might be present at SBF-  
64 regulated promoters even in the absence of Whi5. To test this, we performed ChIP-seq  
65 analysis of Cln3 and the SBF components Swi4 and Swi6, all tagged at their endogenous  
66 loci with the V5 epitope. Cln3-V5 was found at 85 gene promoters, 84 of which were also  
67 bound by SBF (Swi4-V5 and Swi6-V5; Table S3). These sites include key SBF binding-  
68 sites in the *CLN1* and *CLN2* promoters (Fig. 1E, fig. S1E to F), consistent with previous  
69 ChIP experiments showing conditionally-expressed Cln3 binding at the *CLN2* promoter(8).  
70 Furthermore, Cln3-V5 localization to SBF-binding sites, including the *CLN2* promoter, did  
71 not depend on Stb1 or Whi5, showing that the presence of Cln3 at SBF sites did not  
72 depend on its previously assumed target protein (Fig. 1E, fig. S1E to F).

73

74 That Cln3 binds SBF-regulated promoters suggests that Cln3-Cdk1 phosphorylates a  
75 different target involved in SBF-dependent transcription. To explore this possibility, we  
76 examined Cln3-Cdk1 kinase activity towards SBF-interacting proteins *in vitro*. To purify  
77 Cln3-Cdk1, we fused *CLN3* to *CDK1* using a glycine-serine linker(23, 24) (*CLN3-L-CDK1*)  
78 because Cln3 is not as tightly bound to Cdk1 as the other yeast cyclins. When the  
79 endogenous *CLN3* allele was replaced by this fusion allele, cells exhibited no cell cycle  
80 defects and were the same size as wild type, suggesting that this fusion complex functions  
81 similarly to the wild type allele (fig. S2A). We note that, to the best of our knowledge, this  
82 is the first time active Cln3-Cdk1 complexes have been purified to homogeneity. Kinase  
83 activity detected in a previously reported purification of Cln3-Cdk1 expressed in insect  
84 cells(4), which we repeated, was not due to Cln3 because this activity was still present in  
85 a negative control lacking Cln3 (see methods; fig. S2B). Consistent with our *in vivo*  
86 phosphorylation data, Cln3-L-Cdk1 poorly phosphorylated Whi5 *in vitro*, while Cln2-L-  
87 Cdk1 readily hyperphosphorylated Whi5 (Fig. 1F). Moreover, Cln3-L-Cdk1 poorly  
88 phosphorylated the SBF-associated proteins(8, 25-27) Swi6, Stb1, and Msa1 *in vitro* (Fig.  
89 1G). This is consistent with a previous study concluding that although the SBF subunit  
90 Swi6 was required for Cln3 function, it was not a direct target of Cln3-Cdk1(28).

91  
92 The absence of Cln3-dependent phosphorylation on proteins at SBF-regulated promoters,  
93 combined with Cln3-Cdk1's lack of *in vitro* activity against the model Cdk substrate H1  
94 (Fig. 1G), suggested that Cln3 may promote the G1/S transition independently of Cdk1  
95 kinase activity. To test this possibility, we examined the effect of replacing *CLN3* with a  
96 *CLN3* allele fused to a previously described kinase dead *CDK1* allele(29)(*CDK1<sup>KD</sup>*; Fig.  
97 2A, fig. S2C). Although *CLN3-L-CDK1<sup>KD</sup>* rescued the effects of *cln3Δ*, immunoprecipitation  
98 revealed endogenous Cdk1 bound to the fusion protein (fig. S2D). To prevent this, we  
99 introduced a cyclin box mutation to *CLN3* that prevents its binding to Cdk1(30) (*CLN3<sup>CBM</sup>*;  
100 Fig. 2A). Replacing *CLN3* with *CLN3<sup>CBM</sup>* resulted in a similar large size phenotype as  
101 *cln3Δ*, while replacing *CLN3* with *CLN3<sup>CBM</sup>-L-CDK1* resulted in wild type sized cells,  
102 indicating that the fusion allows Cln3<sup>CBM</sup> to activate Cdk1 (Fig. 2B). *CLN3<sup>CBM</sup>-L-CDK1<sup>KD</sup>*  
103 cells lacking Cln3 activity were similar in size to *cln3Δ* cells, suggesting that Cln3-Cdk1  
104 kinase activity is indeed required to drive the cell cycle through G1/S (Fig. 2B).

105  
106 To confirm that Cln3-Cdk1 requires kinase activity to promote cell-cycle progression, we  
107 examined its function in the context of a simplified cell-cycle control network. We first  
108 replaced the *CDK1* promoter with the glucose-repressible *GAL1* promoter so that all  
109 endogenous Cdk1 activity could be conditionally removed. We then proceeded to add  
110 back cyclin-Cdk1 fusion proteins expressed from their endogenous cyclin promoters. Cells  
111 were viable on glucose when *CLB2-L-CDK1* was added to drive M-phase, *CLB5-L-CDK1*  
112 was added to drive S-phase, and *CLN3-L-CDK1* was added to drive G1/S (Fig. 2C to E).  
113 However, addition of *CLN3-L-CDK1<sup>KD</sup>* instead of *CLN3-L-CDK1* was insufficient for  
114 proliferation, which supports a model in which Cln3-Cdk1 kinase activity promotes the  
115 G1/S transition (Fig. 2C to E). The requirement for Cln3-Cdk1 activity was not alleviated  
116 by deletion of *WHI5*, which is consistent with Whi5 not being a Cln3-Cdk1 substrate (fig.  
117 S2F to G).

118  
119 Having established that Cln3-Cdk1 requires kinase activity to promote the G1/S transition,  
120 we sought to identify its substrates. We performed a candidate-based *in vitro* screen(31),  
121 in which we measured the activity of purified Cln3-L-Cdk1 and other yeast cyclin-Cdk1  
122 complexes towards >20 Cdk1 target proteins (Fig. 3A to C; fig. S3A to D). By far the most  
123 specific target for Cln3-L-Cdk1 was the RNA polymerase II subunit Rbp1, which contains  
124 a C-terminal unstructured region (CTD) with multiple heptapeptide repeats (26 in yeast,

125 52 in humans) of the sequence Y<sub>1</sub>S<sub>2</sub>P<sub>3</sub>T<sub>4</sub>S<sub>5</sub>P<sub>6</sub>S<sub>7</sub> (32) (Fig. 3C). Truncations of Rpb1 to first  
126 isolate the unstructured C-terminal region and then to remove the regions on either side  
127 of the CTD heptad repeats did not reduce phosphorylation, implying that Cln3-Cdk1  
128 directly targets one or multiple residues inside the heptapeptide repeats independently of  
129 the adjacent unstructured regions (Fig. 3D to E).

130  
131 Phosphorylation of the different residues within these heptad repeats by the canonical  
132 transcriptional kinases regulates transcriptional initiation, elongation, and termination(32).  
133 To compare Cln3-Cdk1 with the four known transcriptional kinases, we applied our *in vitro*  
134 approach to purify Ccl1-L-Kin28, Bur2-L-Bur1, Ctk2-L-Ctk1 and Ssn8-L-Ssn3, which  
135 correspond to human Cdk7, Cdk9, Cdk12, and Cdk8 complexes respectively(33). This  
136 revealed Cln3-Cdk1, Kin28, Ssn3 and Ctk1 all phosphorylate residues inside the CTD  
137 repeats independently of the adjacent unstructured regions (fig. S3E to G). In contrast,  
138 Bur1 did not phosphorylate the CTD repeats without the C-terminal non-repeat element  
139 (Fig. 3E), consistent with published work(34).

140  
141 To determine the function of Cln3-Cdk1 phosphorylation of the CTD, we sought to identify  
142 the specific target residues. To do this, we generated a series of model substrates  
143 comprising a GST sequence followed by four wild type or mutant CTD consensus repeats  
144 (GST-4CTD) (Fig. 3F). Of the possible Cdk phosphorylation site mutants, only mutation of  
145 the serine 5 residue prevented phosphorylation (GST-4CTD<sub>S5A</sub>). Conversely, the addition  
146 of S<sub>5</sub> to a repeat region lacking all serines restored phosphorylation (GST-4CTD<sub>S5</sub> in Fig.  
147 3G). Similar results were found when this set of substrates was phosphorylated by Ccl1-  
148 L-Kin28, but not when phosphorylated by other cyclin-Cdk1 complexes (Fig. 3G to H).  
149 That Cln3-Cdk1 could function as an S<sub>5</sub> CTD kinase is consistent with the reported genetic  
150 interactions between the canonical S<sub>5</sub> CTD kinase Kin28 and Cdk1(35). To determine if  
151 other residues inside the CTD heptad might be responsible for Cln3-Cdk1 specificity, we  
152 performed *in vitro* kinase assays with additional GST-4CTD substrates in which Y<sub>1</sub>, P<sub>3</sub>, T<sub>4</sub>,  
153 or P<sub>6</sub> were substituted with alanines. Phosphorylation was decreased by Y<sub>1</sub>, P<sub>3</sub>, and P<sub>6</sub>  
154 mutations, but not by T<sub>4</sub> mutation (Fig. 3G; fig. S3E). The effect of the P<sub>6</sub> alanine  
155 substitution was expected because Cdk1 is a proline directed kinase, while the P<sub>3</sub>  
156 requirement 2 residues N-terminal to the phosphorylation site is similar to that found to  
157 enhance phosphorylation by Cln2-Cdk1 complexes(31). However, the Y<sub>1</sub> requirement was  
158 surprising and suggests a highly specific substrate preference for the active site of Cln3-  
159 Cdk1. Taken together, our results show that Cln3-Cdk1 likely phosphorylates S<sub>5</sub> and that  
160 this phosphorylation depends on the local amino acid sequence (Fig. 3I).

161  
162 That Cln3 localizes to specific SBF-regulated promoters, and that Cln3-L-Cdk1 functions  
163 as an S<sub>5</sub> CTD kinase *in vitro*, suggests a model in which Cln3-Cdk1 promotes transcription  
164 of SBF-regulated genes by phosphorylating the CTD of Rpb1 at their promoters. In this  
165 model, Cln3-Cdk1 should be responsible for only a subset of the global S<sub>5</sub> CTD  
166 phosphorylation. To test this model, we first replaced endogenous *KIN28* with the *KIN28<sup>is</sup>*  
167 allele, which expresses a version of Kin28 that can be irreversibly inhibited by a covalently-  
168 binding small molecule(36). Addition of the Kin28 inhibitor reduced S<sub>5</sub> CTD  
169 phosphorylation by 60±3%, and deletion of *CLN3* further reduced phosphorylation by  
170 another 15±5% in cells in the G1 phase of the cell cycle, showing that Cln3-Cdk1  
171 phosphorylates S<sub>5</sub> in the CTD repeats *in vivo* (Fig. 3J to L, fig. S4; see methods).

172  
173 Taken together, our work supports a model in which Cln3-Cdk1 promotes the G1/S  
174 transition by phosphorylating S<sub>5</sub> in the RNA polymerase II CTD at SBF-regulated  
175 promoters (Fig. 4A). This model predicts that we should be able to bypass the requirement

176 for Cln3 by providing an alternative source of S<sub>5</sub> phosphorylation to SBF-regulated  
177 promoters. To test this, we used a rapamycin-dependent inducible binding system to  
178 conditionally recruit a fusion protein of the canonical CTD S<sub>5</sub> kinase Ccl1-L-Kin28 to SBF  
179 via its Swi6 or its Swi4 subunit (Fig. 4B, fig. S5A and B). We note that all these strains  
180 contain the *tor1-1 fpr1Δ* mutations so that growth is not affected by rapamycin(37).  
181 Strikingly, recruitment of Ccl1-L-Kin28 to SBF fully rescues the size and cell cycle  
182 phenotypes of *cln3Δ* cells and this rescue is dependent on Kin28 kinase activity (Fig. 4C  
183 to E, fig. S5C to F). This rescue was not due to Kin28 phosphorylation of Whi5 (fig. S5G  
184 to J).

185  
186 Thus, Cln3-Cdk1 promotes the first step in the budding yeast cell cycle by directly  
187 phosphorylating RNA Polymerase II at SBF-regulated genes. Surprisingly, Cln3-Cdk1 did  
188 not phosphorylate its expected target, the SBF inhibitor Whi5, or any other proteins on the  
189 SBF transcription factor complex. Moreover, our screen suggests that Cln3-Cdk1 has few,  
190 if any, targets other than the RNA Polymerase II subunit Rpb1's CTD. Cln3-Cdk1's  
191 extreme specificity—for a single target driving the first step of the cell cycle—may help  
192 order cell cycle events(31). If, as we suspect, Cln3 has no targets driving replication,  
193 spindle pole body duplication, cell polarization, or any other cell cycle event, the level of  
194 Cln3 can be used to exclusively modulate the G1/S transition without risking premature  
195 triggering of downstream cell cycle events.

196  
197 That Cln3 and Whi5 serve as separate inputs to SBF activity can be rationalized by their  
198 potentially separate functions. In G1, Whi5 concentration directly reflects cell size because  
199 Whi5 is a stable protein and a constant number of Whi5 molecules is synthesized in  
200 S/G2/M phases independent of cell size and growth conditions(20, 38). As cells grow in  
201 G1, Whi5 is then diluted so that its concentration is determined by cell size. In contrast,  
202 Cln3 concentration is constant in G1 as cells grow in a given condition, but this constant  
203 G1 concentration is higher when cells are growing rapidly, as in glucose, and lower, when  
204 cells are growing more slowly, as in ethanol(7, 39-43). Thus, Cln3 and Whi5 may  
205 independently reflect cell growth and size, respectively.

206  
207 While the cell cycle Cdks and the transcriptional Cdks are all part of the same kinase  
208 family, their functions are largely thought to have diverged along their separate  
209 branches(44, 45). Our work here breaks down the previous dichotomy of cell cycle and  
210 transcriptional Cdks and shows how cell cycle Cdks can directly activate transcription at  
211 specific target genes to drive a cell cycle transition. The functional overlap of cell cycle  
212 and transcriptional Cdks has already been pointed to by the dual function of the Kin28  
213 orthologs, Msc6 and Cdk7 in fission yeast and vertebrate cells, respectively. They both  
214 activate the cell cycle Cdks by phosphorylating their T-loops while also activating  
215 transcription as a global S<sub>5</sub> CTD kinase(46-48). In addition, Cdk1 and Cdk2 were identified  
216 as the first RNA Pol II CTD kinases *in vitro*, but if they function in such a manner *in vivo*  
217 remains unknown(49). That the two branches of Cdks that regulate cell division and  
218 transcription have overlapping functions suggests the possibility that their primordial  
219 ancestor regulated both processes. These functions would then have been partially lost  
220 along the two divergent branches. Thus, our discovery that yeast Cln3-Cdk1 drives cell  
221 cycle progression by directly activating transcription may reflect an ancient link between  
222 basic biosynthetic processes like transcription and the control of cell division.

223



224

FIGURES & CAPTIONS

Figure 1

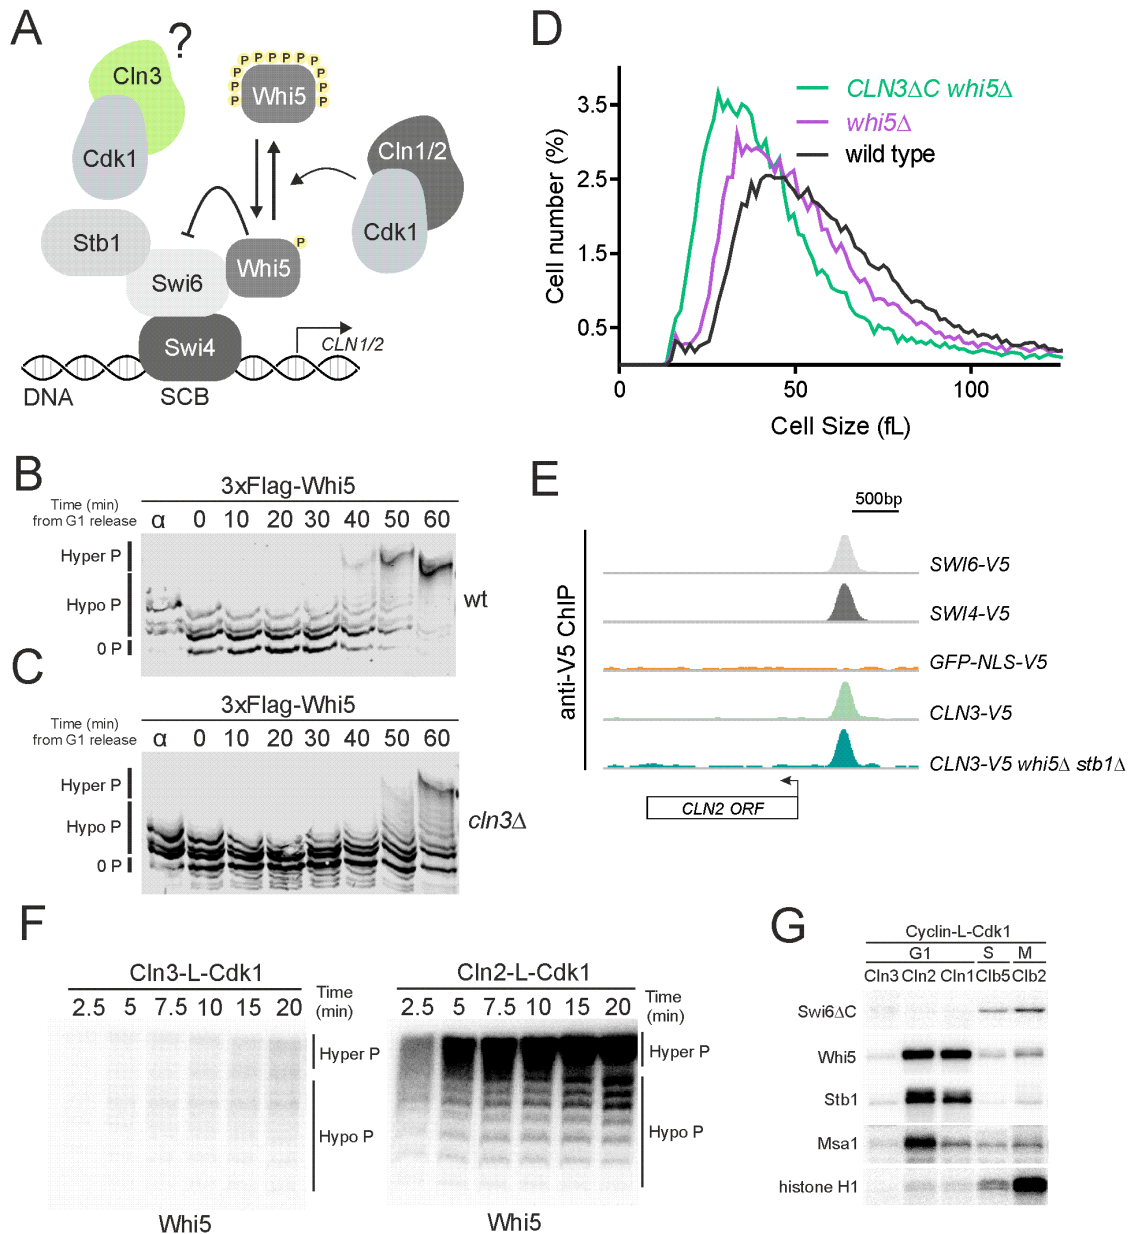

225

226

227

228

229

230

231

232

233

234

235

236

**Fig. 1. Cln3-Cdk1 binds SBF, but does not phosphorylate the transcriptional inhibitor Whi5.** (A) Schematic of the budding yeast G1/S regulatory network. (B) Phos-tag immunoblot time course measuring distinct hypo- and hyper-phosphorylated isoforms of 3xFlag-Whi5 after release from a G1 pheromone arrest. (C) Phos-tag immunoblot time course as in (B) for *cln3Δ* cells. (D) Cell size distributions measured by Coulter counter for the indicated genotypes. Cells were grown on synthetic complete media with 2% glucose. (E) anti-V5 ChIP-seq signal of the indicated genotypes at the *CLN2* locus. *CLN2* is an SBF target, whose expression drives the G1/S transition. See fig. S1E to F and methods for more details. (F) Autoradiographs of *in vitro* Whi5 phosphorylation time courses by Cln2-L-Cdk1 and Cln3-L-Cdk1 fusion proteins, where L denotes a glycine serine linker (see

237 methods for purification and verification of Cln3-L-Cdk1 activity; fig. S3C). Whi5 phospho-  
238 isoforms were resolved using Phos-tag SDS-PAGE. All reactions contain equal amounts  
239 of the indicated cyclin-L-Cdk1 complexes. (G) Autoradiographs of *in vitro* phosphorylation  
240 of SBF-interacting proteins and histone H1 by the indicated cyclin-L-Cdk1 complexes. All  
241 reactions contain equal amounts of the respective cyclin-L-Cdk1 complexes.

242

## Figure 2

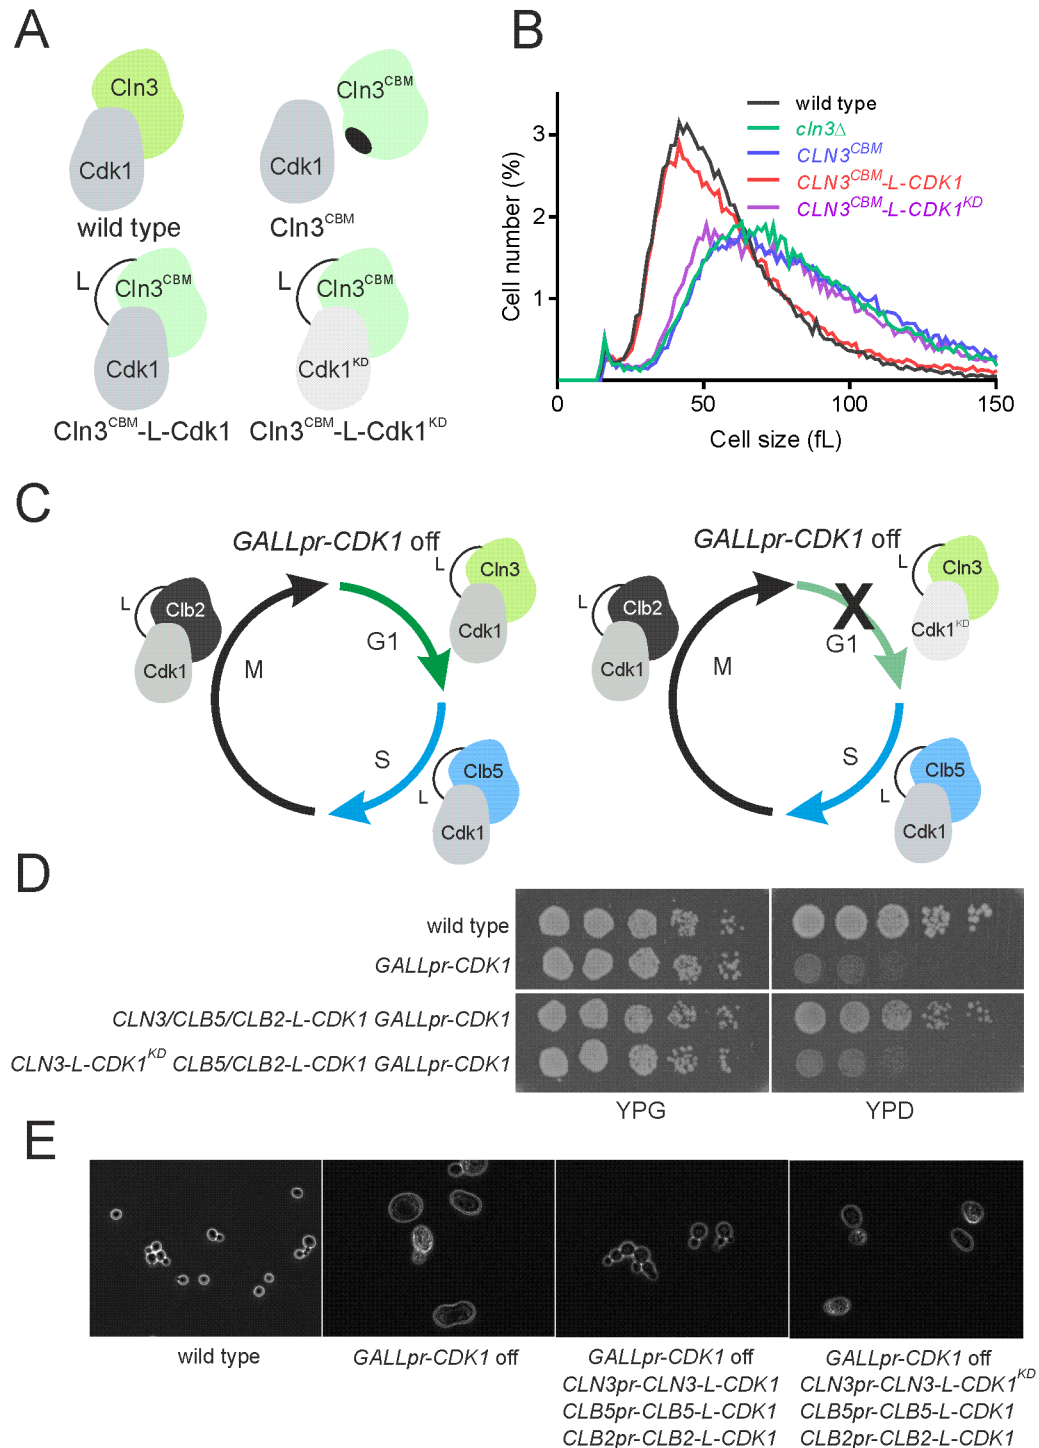

243

244

245

246

247

248

**Fig. 2. Cln3-Cdk1 kinase activity promotes the G1/S transition.** (A) Schematic of the different Cln3-Cdk1 complexes used. Cln3<sup>CBM</sup> denotes a cyclin box mutant that does not bind Cdk1 unless fused via the linker, L. Cdk1<sup>KD</sup> denotes a kinase dead mutant of Cdk1. (B) Cell size distributions measured by Coulter counter for the indicated genotypes. Cells were grown on synthetic complete media +2% glucose. (C) Schematic of the experimental



249 design shown in (D). The endogenous *CDK1* promoter was replaced with the galactose-  
250 inducible *GALL* promoter (*GALLpr*). *CLN3*, *CLB5*, and *CLB2* were then fused at their  
251 endogenous locus to *CDK1*. (D) Spot viability assays of WT and *GALLpr-CDK1* strains  
252 the on YPG (*GALLpr* ON) or YPD (*GALLpr* OFF). The triple *cyclin-CDK1* fusion rescues  
253 *CDK1* repression only if *CLN3* is fused to an active *CDK1*. (E) Phase contrast images of  
254 cells of the indicated genotypes after *GALLpr-CDK1* repression.

## Figure 3

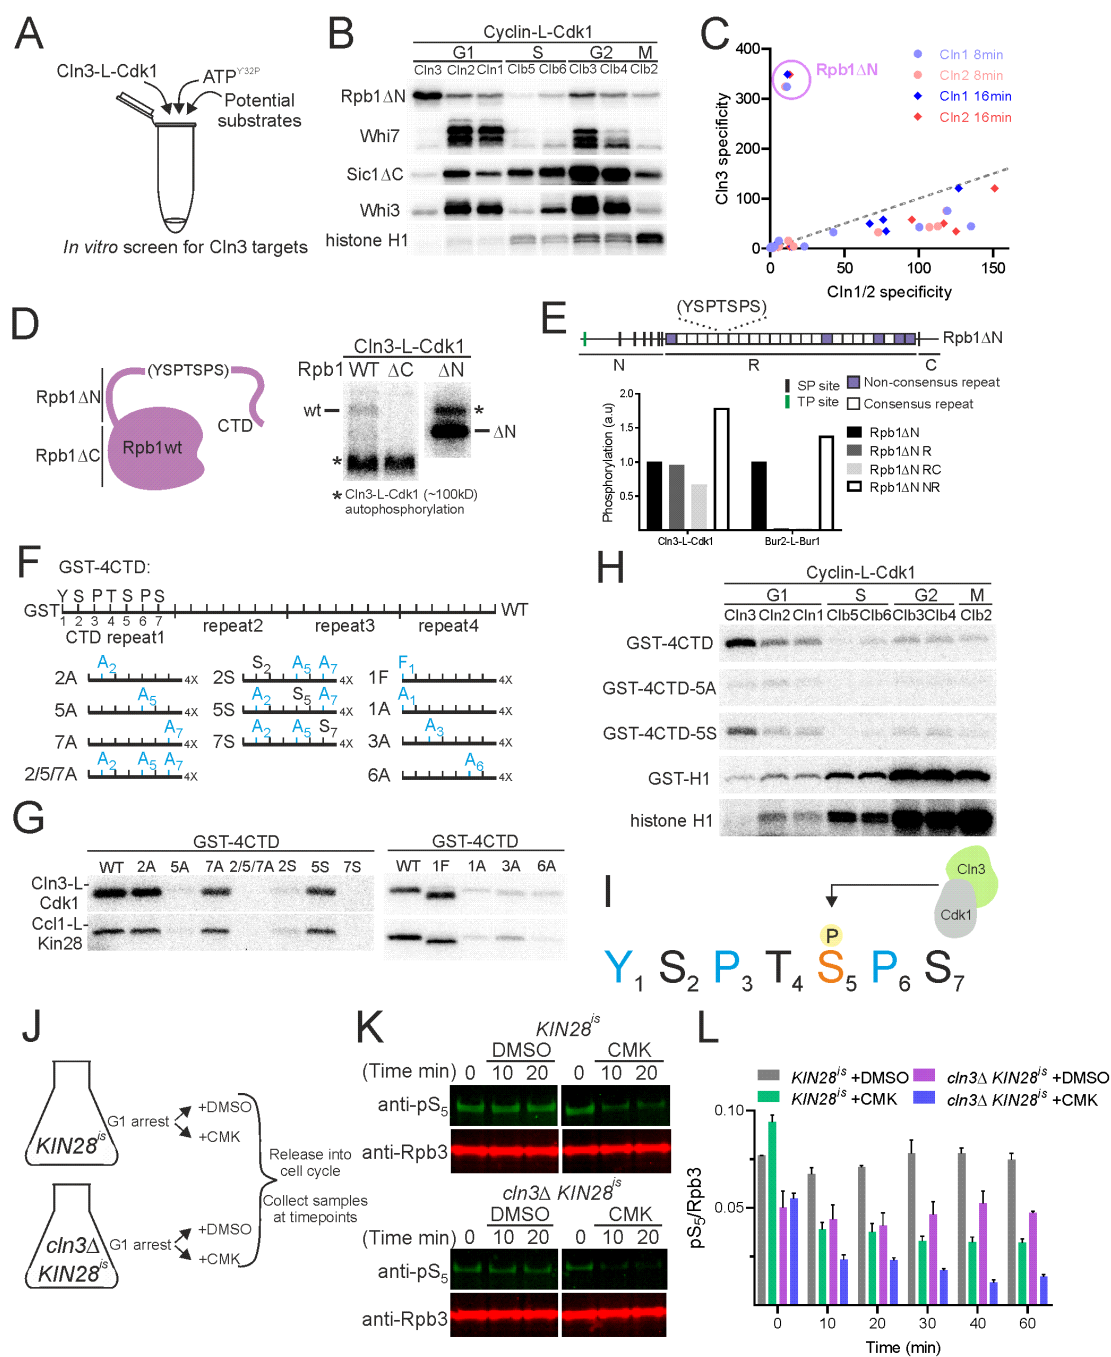

255  
256  
257  
258  
259  
260  
261  
262  
263  
264

**Fig. 3. Cln3-Cdk1 phosphorylates the serine 5 residue in the Pol II subunit Rpb1's C-terminal domain repeats.** (A) Schematic of *in vitro* candidate based screen for Cln3-Cdk1 targets. (B) Autoradiographs of *in vitro* phosphorylation of a subset of candidate substrates by the indicated cyclin-L-Cdk1 complexes. All reactions contain equal amounts of the indicated cyclin-L-Cdk1 complexes. (C) Quantification of *in vitro* phosphorylation specificity by Cln3-L-Cdk1 compared to Cln1-L-Cdk1 or Cln2-L-Cdk1. Specificity is defined as the ratio of activity towards the indicated substrate relative to the activity towards the Cdk1 model substrate histone H1. Each point corresponds to a single substrate (n=20)

265 and quantifications from two time points are plotted. Dotted line denotes  $x=y$  where Cln3-  
266 L-Cdk1 substrate specificity is equally to Cln1-L-Cdk1 or Cln2-L-Cdk1 specificity. See  
267 methods and Table S4 for measurements. **(D)** Autoradiographs of *in vitro* phosphorylation  
268 by Cln3-L-Cdk1 of Rpb1 and Rpb1 truncations (WT denotes full length;  $\Delta C$  denotes the  
269 1453 N-terminal residues;  $\Delta N$  denotes the 280 C-terminal residues). We note the low yield  
270 of full length Rpb1 (~192kD) results in a lower phosphorylation signal than the  $\Delta N$ . Full  
271 length and  $\Delta C$  Rpb1 were resolved on 6% SDS PAGE gels, while  $\Delta N$  was resolved on a  
272 separate 10% SDS PAGE gel. **(E)** Autoradiograph quantification from *in vitro* kinase  
273 assays phosphorylating Rpb1 $\Delta N$  and Rpb1 $\Delta N$  truncations by Cln3-L-Cdk1 and the  
274 transcriptional kinase Bur2-L-Bur1. See fig. S3G for autoradiograph images including data  
275 for other transcriptional kinases. **(F)** Schematic of GST epitope model substrates used in  
276 (G), containing 4 copies of the CTD repeat. **(G)** Autoradiographs of *in vitro* phosphorylation  
277 of CTD repeats with the indicated amino acid substitutions by Cln3-L-Cdk1 and Ccl1-L-  
278 Kin28. **(I)** Schematic showing  $S_5$  specific phosphorylation by Cln3-Cdk1. **(J)** Schematic of  
279 experimental design for (K-L). *Kin28<sup>is</sup>* or *Kin28<sup>is</sup> cln3 $\Delta$*  cells were released from G1  
280 pheromone arrest into DMSO or CMK. *Kin28<sup>is</sup>* contains an active site mutant rendering it  
281 sensitive to covalent inhibition by the small molecule CMK. **(K)** Representative  
282 immunoblots for total cellular phosphorylated Rpb1-CTD  $S_5$  (H14 antibody) and total  
283 cellular RNA polymerase II (Rpb3) after release from G1 pheromone arrest into DMSO or  
284 CMK. See fig. S4C for full immunoblots. **(L)** Quantification of total cellular phosphorylated  
285 Rpb1-CTD  $S_5$  (H14 antibody) normalized to total cellular RNA polymerase II (Rpb3). Mean  
286  $\pm$  S.E.M. is plotted, calculated from two independent biological replicates.

## Figure 4

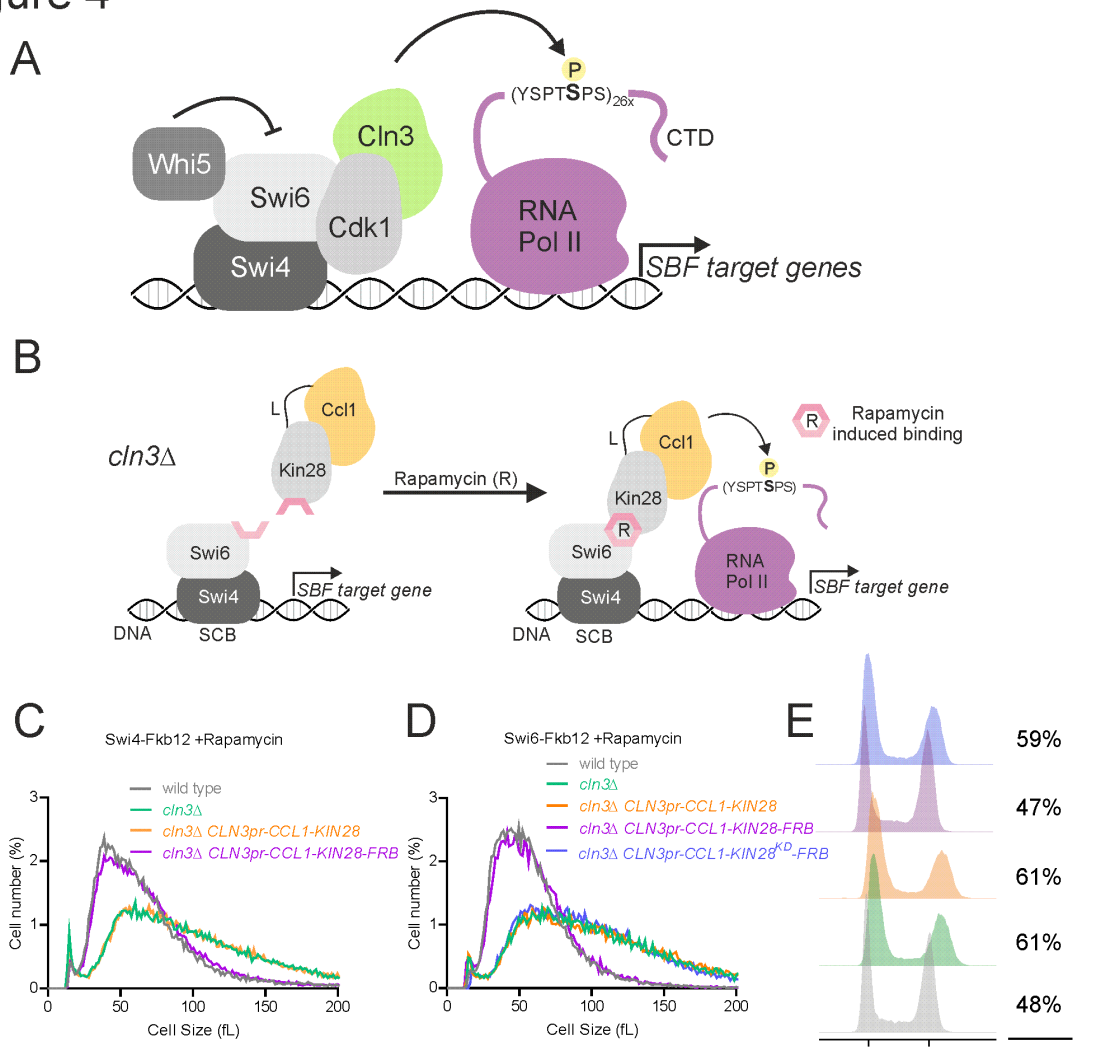

287

288

289 **Fig. 4. Induced binding of the S<sub>5</sub> Rpb1 CTD kinase Ccl1-Kin28 to SBF rescues the**

290 **cell cycle defects of *cln3Δ* cells. (A) Model in which Cln3-Cdk1 activates transcription**

291 **at SBF-dependent promoters by phosphorylating Rpb1's CTD on S<sub>5</sub>. (B) Schematic of**

292 **experiment in (c-e): conditional recruitment of Ccl1-L-Kin28 to SBF using the rapamycin**

293 **inducible binding system. (C-D) Cell size distributions measured by Coulter counter for the**

294 **indicated genotype. Ccl1-L-Kin28 fusion proteins were expressed from a genomically**

295 **integrated copy of the *CLN3* promoter. Ccl1-L-Kin28-FRB was recruited to SBF via Swi4**

296 **(C) or Swi6 (D) upon rapamycin treatment. Ccl1-L-Kin28 lacking FRB is not recruited. All**

297 **strains were grown on synthetic complete media with 2% glucose and with 1μg/ml**

298 **rapamycin or DMSO. *KIN28<sup>KD</sup>* denotes a kinase-dead *KIN28*, whose recruitment to SBF**

299 **does not rescue defects associated with *cln3Δ*. (E) Flow cytometry analysis of DNA**

300 **TABLES AND TABLE CAPTIONS**

301

302 **Table S1: *Saccharomyces cerevisiae* strains used in this study.** Parentheses denote  
 303 plasmids, unless otherwise noted all other genotypes represent genomic integration.  
 304 Strains and plasmids were made using standard methods. DOM0090 was obtained from  
 305 David Morgan, JE103 was obtained from Jennifer Ewald(50), and K14708 was obtained  
 306 from Euroscarf(37). *CLN3<sup>CBM</sup>* denotes the mutations to the cyclin box of *CLN3*(30).  
 307 *KIN28<sup>nointron</sup>* denotes an allele of *KIN28* where the intron was removed. *CLN3-ΔC* denotes  
 308 an allele of *CLN3* lacking the C-terminal unstructured region, *i.e.*, the allele is truncated at  
 309 bp1197. *WHI5<sup>CDK</sup>* denotes an allele of *WHI5* where two non-Cdk1 sites that we found to  
 310 be phosphorylated in G1 were removed (Kõivomägi et al *in preparation*). *CDK1<sup>KD</sup>* denotes  
 311 a kinase dead allele of *CDK1* where K40 was mutated to L(29). *KIN28<sup>s</sup>* denotes a *KIN28*  
 312 allele that can be covalently inhibited(36). *SIC1dC* denotes a *SIC1* allele truncated at  
 313 bp645(51). *RPB1dN* (bp4360-5202) and *RPB1dC* (bp1-4359) denote truncations of either  
 314 the N- or C-terminal unstructured regions. Subscript numbers denote the basepairs  
 315 present of the gene indicated that were present.

316

317 Strain

Description

318

|     |         |                                                             |
|-----|---------|-------------------------------------------------------------|
| 319 | DOM0090 | (W303) <i>MATa bar1::HisG</i>                               |
| 320 | MKy9    | (W303) <i>MATa ksp1::TRP1</i>                               |
| 321 | MKy12   | MKy9 [pGAL1-3Flag-CLN3-L-CDK1-pRS425]                       |
| 322 | MKy350  | MKy9 [pGAL1-3Flag-CLN3 <sup>CBM</sup> -L-CDK1-pRS425]       |
| 323 | MKy38   | MKy9 [pGAL1-3Flag-CLN2-L-CDK1-pRS425]                       |
| 324 | MKy226  | MKy9 [pGAL1-3Flag-CLN1-L-CDK1-pRS425]                       |
| 325 | MKy770  | MKy9 <i>sic1::URA3</i>                                      |
| 326 | MKy759  | MKy770 [pGAL1-3Flag-CLB5-L-CDK1-pRS425]                     |
| 327 | MKy760  | MKy770 [pGAL1-3Flag-CLB6-L-CDK1-pRS425]                     |
| 328 | MKy761  | MKy770 [pGAL1-3Flag-CLB3-L-CDK1-pRS425]                     |
| 329 | MKy762  | MKy770 [pGAL1-3Flag-CLB4-L-CDK1-pRS425]                     |
| 330 | MKy763  | MKy770 [pGAL1-3Flag-CLB2-L-CDK1-pRS425]                     |
| 331 | MKy669  | MKy9 [pGAL1-3Flag-CCL1-L-KIN28 <sup>nointron</sup> -pRS425] |
| 332 | MKy752  | MKy9 [pGAL1-3Flag-BUR2-L-BUR1-pRS425]                       |
| 333 | MKy753  | MKy9 [pGAL1-3Flag-CTK2-L-CTK1-pRS425]                       |
| 334 | MKy754  | MKy9 [pGAL1-3Flag-SSN8-L-SSN3-pRS425]                       |
| 335 | MKy31-1 | DOM0090 <i>cln3::LEU2</i>                                   |
| 336 | MKy92-1 | DOM0090 <i>whi5::LEU2</i>                                   |
| 337 | MKy347  | DOM0090 <i>cln3::CLN3-ΔC::HIS3</i>                          |
| 338 | MKy348  | MKy92-1 <i>cln3::CLN3-ΔC::HIS3</i>                          |
| 339 | MKy21   | DOM0090 <i>whi5::HIS3</i>                                   |
| 340 | MKy76   | MKy21 <i>WHI5pr-3Flag-WHI5<sup>CDK</sup>-pRS406</i>         |
| 341 | MKy77   | MKy76 <i>cln3::hphMX</i>                                    |
| 342 | MKy554  | DOM0090 <i>CLN3-V5::hphMX</i>                               |
| 343 | MKy555  | DOM0090 <i>HIS3pr-GFP-NLS-V5-pRS306::URA3</i>               |
| 344 | MKy653  | DOM0090 <i>SWI4-V5::hphMX</i>                               |
| 345 | MKy645  | DOM0090 <i>SWI6-V5::hphMX</i>                               |
| 346 | MKy637  | MKy554 <i>whi5::URA3</i>                                    |
| 347 | MKy627  | MKy554 <i>stb1::URA3</i>                                    |
| 348 | MKy812  | MKy637 <i>stb1::LEU2</i>                                    |
| 349 | JE103   | <i>MATa ADE2 cln3::TRP1</i>                                 |
| 350 | MKy367  | JE103 <i>CLN3pr-pRS406</i>                                  |



|     |          |                                                                    |
|-----|----------|--------------------------------------------------------------------|
| 351 | MKy369   | JE103 <i>CLN3pr -CLN3-pRS406</i>                                   |
| 352 | MKy372   | JE103 <i>CLN3pr -CLN3<sup>CBM</sup>-pRS406</i>                     |
| 353 | MKy395   | JE103 <i>CLN3pr -CLN3<sup>CBM</sup>-L-CDK1-pRS406</i>              |
| 354 | MKy386   | JE103 <i>CLN3pr -CLN3<sup>CBM</sup>-L-CDK1<sup>KD</sup>-pRS406</i> |
| 355 | MKy320   | DOM0090 <i>cdk1::prGALL-CDK1-kanMX4</i>                            |
| 356 | MKy280   | DOM0090 <i>cln3::CLN3-L-CDK1-TRP1</i>                              |
| 357 | MKy281   | DOM0090 <i>cln3::CLN3-L-CDK1<sup>KD</sup>-TRP1</i>                 |
| 358 | MKy343   | MKy280 <i>clb5::CLB5-L-CDK1-LEU2</i>                               |
| 359 | MKy344   | MKy281 <i>clb5::CLB5-L-CDK1-LEU2</i>                               |
| 360 | MKy345   | MKy343 <i>clb2::CLB2-L-CDK1-HIS3</i>                               |
| 361 | MKy346   | MKy344 <i>clb2::CLB2-L-CDK1-HIS3</i>                               |
| 362 | MKy341   | MKy345 <i>cdk1::prGALL-CDK1-kanMX4</i>                             |
| 363 | MKy342   | MKy346 <i>cdk1::prGALL-CDK1-kanMX4</i>                             |
| 364 | MKy784   | MKy320 <i>whi5::hphMX</i>                                          |
| 365 | MKy785   | MKy341 <i>whi5::hphMX</i>                                          |
| 366 | MKy786   | MKy342 <i>whi5::hphMX</i>                                          |
| 367 | MKy768-1 | DOM0090 <i>kin28::KIN28<sup>is</sup>-TRP1</i>                      |
| 368 | MKy783-1 | MKy768-1 <i>cln3::natMX</i>                                        |
| 369 | K14708   | (W303) <i>MATa tor1-1 fpr1::natMX</i>                              |
| 370 | MK629-1  | K14708 <i>whi5::URA3</i>                                           |
| 371 | MK630-1  | K14708 <i>cln3::URA3</i>                                           |
| 372 | MKy631-1 | K14708 <i>SWI6-FKB12::TRP1</i>                                     |
| 373 | MKy666-1 | MKy631-1 <i>cln3::LEU2</i>                                         |
| 374 | MKy680-1 | MKy666-1 <i>CLN3pr-CCL1-L-KIN28-Frb-SIVh::HIS3</i>                 |
| 375 | MKy681-1 | MKy666-1 <i>CLN3pr-CCL1-L-KIN28-SIVh::HIS3</i>                     |
| 376 | MKy803-1 | MKy666-1 <i>CLN3pr-CCL1-L-KIN28<sup>KD</sup>-Frb-SIVh::HIS3</i>    |
| 377 | KSy026-4 | <i>MATa ADE2 bck2::TRP1 cln3::LEU2-MET25pr-CLN3</i>                |
| 378 | MKy708-1 | K14708 <i>SWI4-Fkb12::TRP1</i>                                     |
| 379 | MKy706-1 | MKy708-1 <i>cln3::LEU2</i>                                         |
| 380 | MKy719-1 | MKy706-1 <i>CLN3pr-CCL1-L-KIN28-SIVh::HIS3</i>                     |
| 381 | MKy720-1 | MKy706-1 <i>CLN3pr-CCL1-L-KIN28-Frb-SIVh::HIS3</i>                 |

382  
383

**Table S2: Plasmids used in this study.**

384  
385

| 386 | Plasmid | Description                                               |
|-----|---------|-----------------------------------------------------------|
| 387 | pMK178  | <i>pGAL1-3Flag-CLN3-L-CDK1-pRS425</i>                     |
| 388 | pMK185  | <i>pGAL1-3Flag-CLN3<sup>CBM</sup>-L-CDK1-pRS425</i>       |
| 389 | pMK184  | <i>pGAL1-3Flag-CLN2-L-CDK1-pRS425</i>                     |
| 390 | pMK186  | <i>pGAL1-3Flag-CLN1-L-CDK1-pRS425</i>                     |
| 391 | pMK361  | <i>pGAL1-3Flag-CLB5-L-CDK1-pRS425</i>                     |
| 392 | pMK362  | <i>pGAL1-3Flag-CLB6-L-CDK1-pRS425</i>                     |
| 393 | pMK362  | <i>pGAL1-3Flag-CLB3-L-CDK1-pRS425</i>                     |
| 394 | pMK364  | <i>pGAL1-3Flag-CLB4-L-CDK1-pRS425</i>                     |
| 395 | pMK366  | <i>pGAL1-3Flag-CLB2-L-CDK1-pRS425</i>                     |
| 396 | pMK308  | <i>pGAL1-3Flag-CCL1-L-KIN28<sup>nointron</sup>-pRS425</i> |
| 397 | pMK367  | <i>pGAL1-3Flag-BUR2-L-BUR1-pRS425</i>                     |
| 398 | pMK368  | <i>pGAL1-3Flag-CTK2-L-CTK1-pRS425</i>                     |
| 399 | pMK369  | <i>pGAL1-3Flag-SSN8-L-SSN3-pRS425</i>                     |
| 400 | pMK187  | <i>WHI5pr-3Flag-WHI5<sup>CDK</sup>-pRS406</i>             |
| 401 | pMK188  | <i>CLN3pr-pRS406</i>                                      |

|     |         |                                                             |
|-----|---------|-------------------------------------------------------------|
| 402 | pMK189  | <i>CLN3pr-CLN3-pRS406</i>                                   |
| 403 | pMK190  | <i>CLN3pr-CLN3<sup>CBM</sup>-pRS406</i>                     |
| 404 | pMK191  | <i>CLN3pr-CLN3<sup>CBM</sup>-L-CDK1-pRS406</i>              |
| 405 | pMK192  | <i>CLN3pr-CLN3<sup>CBM</sup>-L-CDK1<sup>KD</sup>-pRS406</i> |
| 406 | pMK159  | <i>CLN3<sub>1214-1740</sub>-L-CDK1-pRS403</i>               |
| 407 | pMK160  | <i>CLN3<sub>1214-1740</sub>-L-CDK1<sup>KD</sup>-pRS403</i>  |
| 408 | pMK161  | <i>CLB5<sub>841-1305</sub>-L-CDK1-pRS403</i>                |
| 409 | pMK162  | <i>CLB2<sub>721-1473</sub>-L-CDK1-pRS403</i>                |
| 410 | pMK0150 | <i>SIC1dC-pET28a</i>                                        |
| 411 | pMK163  | <i>WHI5-pET28a</i>                                          |
| 412 | pMK300  | <i>BDP1-pET28a</i>                                          |
| 413 | pMK0078 | <i>STB1-pET28a</i>                                          |
| 414 | pMK140  | <i>WHI3-pET28a</i>                                          |
| 415 | pMK141  | <i>SIC1-pET28a</i>                                          |
| 416 | pMK142  | <i>CLN3-pET28</i>                                           |
| 417 | pMK143  | <i>CLN2-pET28a</i>                                          |
| 418 | pMK144  | <i>RPD3-pET28a</i>                                          |
| 419 | pMK145  | <i>CIP1-pET28a</i>                                          |
| 420 | pMK146  | <i>CLN2dN-pET28a</i>                                        |
| 421 | pMK147  | <i>CLN3dN-pET28a</i>                                        |
| 422 | pMK370  | <i>RPB1dN-pET28a</i>                                        |
| 423 | pMK371  | <i>RPB1dN-R-pET28a</i>                                      |
| 424 | pMK372  | <i>RPB1dN-NR-pET28a</i>                                     |
| 425 | pMK373  | <i>RPB1dN-RC-pET28a</i>                                     |
| 426 | pMK374  | <i>SPT5dN-pET28a</i>                                        |
| 427 | pMK148  | <i>WHI7-pET28a</i>                                          |
| 428 | pMK149  | <i>DOA1-pET28a</i>                                          |
| 429 | pMK150  | <i>GCR1-pET28a</i>                                          |
| 430 | pMK151  | <i>BOI2-pET28a</i>                                          |
| 431 | pMK152  | <i>CDC48dN-pET28a</i>                                       |
| 432 | pMK153  | <i>YMR147-pET28a</i>                                        |
| 433 | pMK0086 | <i>MSA1-pET28a</i>                                          |
| 434 | pMK165  | <i>GST-WHI5-pGEX-4T-1</i>                                   |
| 435 | pMK375  | <i>GST-RPB1dN-pGEX-4T-1</i>                                 |
| 436 | pMK376  | <i>GST-MED15-pGEX-4T-1</i>                                  |
| 437 | pMK377  | <i>GST-SWI6-pGEX-4T-1</i>                                   |
| 438 | pMK378  | <i>GST-SWI4-pGEX-4T-1</i>                                   |
| 439 | pMK379  | <i>GST-RPB1-pGEX-4T-1</i>                                   |
| 440 | pMK380  | <i>GST-RPB1dC-pGEX-4T-1</i>                                 |
| 441 | pMK381  | <i>GST-4CTD-pGEX-4T-1</i>                                   |
| 442 | pMK382  | <i>GST-4CTD-1A-pGEX-4T-1</i>                                |
| 443 | pMK383  | <i>GST-4CTD-1F-pGEX-4T-1</i>                                |
| 444 | pMK384  | <i>GST-4CTD-2A-pGEX-4T-1</i>                                |
| 445 | pMK385  | <i>GST-4CTD-3A-pGEX-4T-1</i>                                |
| 446 | pMK386  | <i>GST-4CTD-5A-pGEX-4T-1</i>                                |
| 447 | pMK387  | <i>GST-4CTD-6A-pGEX-4T-1</i>                                |
| 448 | pMK388  | <i>GST-4CTD-7A-pGEX-4T-1</i>                                |
| 449 | pMK389  | <i>GST-4CTD-2/5/7A-pGEX-4T-1</i>                            |
| 450 | pMK390  | <i>GST-4CTD-2S-pGEX-4T-1</i>                                |
| 451 | pMK358  | <i>CLN3pr-CCL1-L-KIN28-Frb-SIVh</i>                         |
| 452 | pMK359  | <i>CLN3pr-CCL1-L-KIN28-SIVh</i>                             |

|     |         |                                                  |
|-----|---------|--------------------------------------------------|
| 453 | pMK360  | <i>CLN3pr-CCL1-L-KIN28<sup>KD</sup>-Frb-SIVh</i> |
| 454 | pMK315  | <i>CCL1pr-CCL1-L-KIN28-Frb-SIVh</i>              |
| 455 | pMK314  | <i>CCL1pr-CCL1-L-KIN28-SIVh</i>                  |
| 456 | pMS121  | <i>HIS3pr-GFP-NLS-V5-pRS306</i>                  |
| 457 | pBTC054 | <i>GST-H1-pGEX-4T-1</i>                          |

458

459

460 **Table S3: List of gene promoters overlapping with Cln3-V5 ChIP-seq peaks and**  
461 **associated peak coordinates.** See Methods for details.

462

463 **Table S4: List of substrates and quantification of their phosphorylation by G1**  
464 **cyclin-Cdk1 complexes.**

465

466

467 **METHODS**

468

469 **Yeast strains and plasmids.**

470 Standard procedures were used for growth and genetic manipulation of *Saccharomyces*  
471 *cerevisiae*. Cells were grown at 30°C in yeast extract/peptone medium with 2% glucose  
472 (YPD) or 2% galactose (YPGal), or in synthetic complete medium with 2% glucose (SCD)  
473 or 2% raffinose or with 2% glycerol and 1% ethanol. All *S. cerevisiae* strains in this study  
474 are derived from the W303 background. Full genotypes of all strains used in this study are  
475 listed in Table S1. Plasmids used in this study are listed in Table S2. For strains to  
476 conditionally inactivate Kin28, the endogenous *KIN28* gene was replaced with its *KIN28<sup>is</sup>*  
477 counterpart by allele replacement into *cln3Δ* or wild type backgrounds(36). After  
478 recombination, replacement of *KIN28* with *KIN28<sup>is</sup>* was screened by growing colonies on  
479 rich media (YPD) or media containing 5μM CMK (YPD+CMK). Colonies that displayed a  
480 growth defect on YPD+CMK, but not on YPD, were selected and genotyped. For strains  
481 to conditionally recruit the Ccl1-L-Kin28 fusion protein to SBF, we used the anchor-away  
482 technique(37). A rapamycin-resistant strain background that contained a mutated *TOR1*  
483 (*tor1-1*) and deleted *FPR1* (*fpr1Δ*) was used and the anchor (*SWI4* or *SWI6*) was C-  
484 terminally tagged with *FKBP12* (human 12 kDa FK506 binding protein) and an extra copy  
485 of C-terminally tagged *KIN28* was C-terminally tagged with *FRB* (11 kDa, FKBP12-  
486 rapamycin-binding domain of human mTOR) and expressed ectopically as a fusion with  
487 its cyclin partner *CCL1* from the *CLN3* promoter (*CLN3pr-CCL1-L-KIN28-FRB*). To induce  
488 protein binding, cells were cultured at 30°C in SCD media with 1 μg/ml rapamycin, or  
489 DMSO as a control.

490

491 **Cell size measurements.** Cell volume was measured using a Beckman Coulter Z2  
492 counter (Beckman Coulter). Log-phase cultures at OD<sub>600</sub> 0.2-0.3 were briefly sonicated,  
493 and then 100-150 μL was diluted into 10 mL of Isoton II diluent (Beckman Coulter  
494 #8546719), and 40,000-50,000 cells were measured per sample. Particles below 10 fL  
495 and over 300 fL in volume were excluded from analysis.

496

497 **Immunoblotting.** Protein lysates were taken in urea lysis buffer as previously  
498 described(31). Protein lysates were separated on tris-glycine or tris-acetate SDS-PAGE  
499 gels and transferred to a nitrocellulose membrane using the iBlot 2 dry blotting system  
500 (Invitrogen IB21001). The following primary antibodies were used for western-blotting at  
501 1/1000 dilution: anti-Rpb1-CTD clone 8wG16 (mouse, monoclonal, Abcam), anti-Rpb3  
502 clone 1Y26 (mouse, monoclonal, BioLegend), anti-Rpb1-S2-P clone 3E10 (rat,  
503 monoclonal, Millipore), anti-Rpb1-S5-P clone H14 (mouse, monoclonal, BioLegend), anti-  
504 Rpb1-S5-P clone 3E8 (rat, monoclonal, Millipore), anti-Rpb1-S7-P clone 3E12 (rat,  
505 monoclonal, Millipore), anti-Cdc28 clone yC-20 (goat, polyclonal, Santa Cruz), P-  
506 cdc2 (T161) Rabbit antibody (Cell Signaling Technology) or anti-FLAG; clone M2  
507 (mouse, monoclonal, SIGMA). Primary antibodies were detected using the following  
508 fluorescently labeled secondary antibodies at 1/10,000 dilution: IRDye 680LT Goat anti-  
509 Mouse, IRDye 680LT Goat anti-Rat, IRDye 800CW Goat anti-Rat, IRDye 800CW Goat  
510 anti-Mouse (Licor), Alexa Fluor 680 Donkey anti-Mouse, Alexa Fluor 680 donkey anti-  
511 Rabbit and Alexa Fluor 790 Goat anti-Rabbit (Invitrogen by Thermo Fisher Scientific).  
512 Membranes were then imaged on a LI-COR Odyssey CLx.

513

514 **Immunoblot quantifications.** Band intensities were quantified using the LI-COR  
515 ImageStudio Lite software. For the quantifications in Fig. 3L, the Rpb1-CTD-S5-P signal  
516 was normalized for loading to Rpb3. To calculate the Kin28-dependent fraction of Rpb1-  
517 CTD-S5-P, the difference between before (t=0) and after CMK addition (t=20) in the WT

518 (*i.e.*, not *cln3Δ*) background was calculated and divided through its value at t=0. Then, to  
519 calculate the Cln3-dependent Rpb1-CTD-S5-P fraction, the difference between the *cln3Δ*  
520 and *CLN3* wild type background after CMK addition (t=20) was calculated and divided  
521 through its value at t=0 in the *CLN3* wild type background. The mean and S.E.M. were  
522 calculated from two independent biological replicates.  
523

524 **Spot viability assay.** Plate spot assays show cell growth on YP plate with 2% glucose or  
525 2% galactose from a series of culture dilutions (2x, 10x, 5x, and 10x) from an initial amount  
526 of 10<sup>6</sup> cells. Plates were incubated at 30°C and photographed at least 40h later.  
527

528 **Microscopy.** Cells were grown in a CellASIC microfluidic device as previously  
529 described(5). For the experiment in Fig. 2E cells were grown in SC medium with 2%  
530 galactose for 2h before media was replaced with SC 2% glucose to turn off the expression  
531 of endogenous *GAL1pr-CDK1*. Phase-contrast images were acquired every 3 minutes  
532 after media shift, and multiple fields of view were followed simultaneously. For full movies  
533 see supporting material Movies S1-4.  
534

535 **ChIP-seq experiments.** Cells expressing Cln3-V5, Swi4-V5, Swi6-V5 or GFP-NLS-V5  
536 were grown in SC media with 2% glycerol 1% ethanol. 250ml of cells at OD ~0.6 were  
537 fixed with 1% formaldehyde (30 minutes) and quenched with 0.125 M glycine (5 minutes).  
538 Fixed cells were washed twice in cold PBS, pelleted, snap-frozen and stored at -80°C.  
539 Cell lysis and ChIP reactions were performed as previously described(52) with minor  
540 modifications. Pellets were lysed in 300 μL FA lysis buffer (50 mM HEPES-KOH pH 8.0,  
541 150 mM NaCl, 1 mM EDTA, 1% Triton X-100, 0.1% sodium deoxycholate, 1 mM PMSF,  
542 Roche protease inhibitor) with ~1 mL ceramic beads on a Fastprep-24 (MP Biomedicals).  
543 The entire lysate was then collected and adjusted to 1 mL before sonication with a 1/8"  
544 microtip on a Q500 sonicator (Qsonica) for 16 minutes (10 seconds on, 20 seconds off).  
545 The sample tube was held suspended in a -20°C 80% ethanol bath to prevent sample  
546 heating during sonication. Cell debris was then pelleted and the supernatant retained for  
547 ChIP. For each ChIP reaction, 30 μL Protein G Dynabeads (Invitrogen) were blocked (PBS  
548 + 0.5% BSA), prebound with 5-10 μL anti-V5 antibody (SV5-Pk1, BioRad Cat#  
549 MCA1360G) and washed once with PBS before incubation with supernatant (4°C,  
550 overnight). Dynabeads were then washed (5 minutes per wash) twice in FA lysis buffer,  
551 twice in high-salt FA lysis buffer (50 mM HepesKOH pH 8.0, 500 mM NaCl, 1 mM EDTA,  
552 1% Triton X-100, 0.1% sodium deoxycholate, 1 mM PMSF), twice in ChIP wash buffer (10  
553 mM TrisHCl pH 7.5, 0.25 M LiCl, 0.5% NP-40, 0.5% sodium deoxycholate, 1 mM EDTA,  
554 1 mM PMSF) and once in TE wash buffer (10 mM TrisHCl pH 7.5, 1 mM EDTA, 50 mM  
555 NaCl). DNA was eluted in ChIP elution buffer (50 mM TrisHCl pH 7.5, 10 mM EDTA, 1%  
556 SDS) at 65°C for 20 minutes. Eluted DNA was incubated to reverse crosslinks (65°C, 5hr),  
557 before treatment with RNAse A (37°C, 1 hour) and then Proteinase K (65°C, 2 hours).  
558 DNA was purified using the ChIP DNA Clean & Concentrator kit (Zymo Research).  
559 Indexed sequencing libraries were generated using the NEBNext Ultra II DNA Library Prep  
560 kit (NEB Cat # E7645), pooled and sequenced on an Illumina HiSeq instrument as paired  
561 end reads (Novogene, CA).  
562

563 **ChIP-seq analysis.** Data processing was performed in Galaxy (<https://usegalaxy.org/>).  
564 Reads were trimmed to 36bp using *Cutadapt* and then aligned to the *S. cerevisiae* genome  
565 (SacCer3) using *Bowtie2*. RPKM normalized Bigwig files were generated using  
566 *bamCoverage* (bin size =10bp, paired end reads extended, smoothing = 100bp) and used  
567 for track display with *Integrative Genome Viewer*. BAM files were filtered to remove  
568 duplicate and low-quality reads with *BAM filter* before peak calling with *MACS2* using



569 GFP-NLS-V5 as the control (genome size = 12000000, bandwidth = 200). Cln3 peaks  
570 were defined as regions in which peaks were identified in both Cln3-V5 ChIP replicates  
571 (n=58) and SBF peaks were defined as regions in which peaks were identified in Swi4-  
572 V5 and Swi6-V5 ChIP experiments (n=311). SGD genes were downloaded from UCSC  
573 *Main* in BED format and promoters were defined as 1kb upstream of the ORF start. Table  
574 S3 contains the list of 85 promoters which overlapped with the 58 Cln3 peaks.

575  
576 **Protein expression and purification.** Full-length N-terminally glutathione S-transferase-  
577 tagged (GST-tagged) proteins were expressed in the *E. coli* strain BL21 and purified by  
578 glutathione-agarose affinity chromatography (Sigma-Aldrich Cat #G4510) and eluted  
579 using elution buffer (50mM Tris pH 8.0, 100mM KOAc, 25mM MgOAc, 10% glycerol,  
580 15mM glutathione). N-terminally 6His-tagged recombinant substrates were expressed in  
581 the *E. coli* strain BL21 and the purification was performed using cobalt affinity  
582 chromatography. Proteins were eluted using buffer containing 50 mM HEPES pH 7.4,  
583 150mM NaCl, 10% glycerol, and 200mM imidazole. Histone H1 protein, which was used  
584 as a general substrate for Cdk1, was purchased from EMD Millipore (Cat #14-155). GST-  
585 4CTD fusion proteins containing a GST-tag and 4 repeats of the Rpb1 unstructured CTD  
586 consensus repeat or repeats with substitutions in specific residues were expressed and  
587 purified as described above.

588  
589 All cyclin-Cdk1 fusion complexes were purified from budding yeast cells using a 3X FLAG  
590 affinity purification method modified from a previous protocol used for HA-tag  
591 purification(53). Briefly, N-terminally tagged cyclin-Cdk1 fusions were cloned into a  
592 pRS425 vector using a glycine-serine linker(24) and overexpressed from the *GAL1*  
593 budding yeast promoter. The use of a glycine-serine rich linker was a key step in Cln3-L-  
594 Cdk1 purification as the Cln3 protein had notably lower affinity towards Cdk1 in high salt  
595 conditions than other *S. cerevisiae* cyclins. The overexpressed 3X FLAG-tagged cyclin-  
596 Cdk1 complexes were then purified by immunoaffinity chromatography using ANTI-FLAG  
597 M2 affinity agarose beads (Sigma-Aldrich Cat #A2220) and eluted with 0.2 mg/mL 3X  
598 FLAG peptide (Sigma-Aldrich Cat #F4799). We note that similar cyclin-Cdk fusions have  
599 previously been able to restore wild-type function *in vivo*(23). Cks1 was purified as  
600 described previously(54) and added separately to Cdk1 enzyme complexes in all  
601 phosphorylation assays.

602  
603 ***In vitro* phosphorylation assays.** For all phosphorylation assays, equal amounts of  
604 substrate and purified kinase complexes were used. Substrate concentrations were kept  
605 in the range of 1-5  $\mu$ M for different experiments but did not vary within any experiment.  
606 Reaction aliquots were taken at two time points (if not stated otherwise, at the 8- and 16-  
607 minute time points) and the reaction was stopped with SDS-PAGE sample buffer. The  
608 basal composition of the assay mixture contained 50 mM HEPES pH 7.4, 150 mM NaCl,  
609 5 mM MgCl<sub>2</sub>, 0.2 mg/ml 3X FLAG peptide, 6% glycerol, 3 mM EGTA, 0.2 mg/ml BSA, and  
610 500  $\mu$ M ATP (with 2  $\mu$ Ci of [ $\gamma$ -<sup>32</sup>P] ATP added per reaction; PerkinElmer  
611 BLU502Z250UC). Phosphorylated proteins were separated on 10% SDS-PAGE gels  
612 unless stated otherwise. In the case of GST-4CTD model substrates, 12% SDS-PAGE  
613 gels were used, while in the case of full length Rpb1 and Rpb1 $\Delta$ C, 6% SDS-PAGE gels  
614 were used. Phosphorylation of substrate proteins was visualized using autoradiography  
615 (Typhoon 9210; GE Healthcare Life Sciences). Autoradiographs were quantified with the  
616 ImageQuant TL Software (GE Healthcare Life Sciences).

617  
618 **Baculovirus-based Cyclin-Cdk1-Cks1 complex expression and purification.**  
619 Baculovirus-based expression of yeast Cyclin-Cdk1-Cks1 complexes was performed

620 following (4), as described in (55). Briefly, Sf9 insect cells (gift of Tim Stearns) were grown  
621 to confluence in a 75 cm<sup>2</sup> culture flask in Sf-900 II SFM media (Thermo-Fisher, Waltham,  
622 MA) and infected with 3 mL, 1.5 mL, and 1.5 mL, respectively, of GST-Cdk1, Cln3, and  
623 Cks1 baculovirus stocks (Gift of Mike Tyers). For the no-Cln3 control, Cln3 virus was  
624 omitted. After 40 hours of infection, cells were harvested, pelleted, and frozen before being  
625 used for purification as follows. Frozen insect cell pellets were thawed and resuspended  
626 in 2 mL of ice-cold lysis buffer (50 mM HEPES pH 7.2, 150 mM NaCl, 5 mM EDTA, 0.1%  
627 v/v NP-40, 10% v/v glycerol) supplemented with protease inhibitors (1 µg/mL Pepstatin A,  
628 1 µg/mL Leupeptin, >2 KIU/mL Aprotinin, 1 mM Benzamidin, 1 µg/mL Bestatin, 2 mM  
629 PMSF) and phosphatase inhibitors (50 mM NaF, 1 mM Sodium orthovanadate, 80 mM  
630 Beta-glycerophosphate). Resuspended cells were incubated for 30 minutes on ice before  
631 being centrifuged for 10 minutes at 18,000 x g at 4°C. The supernatant was transferred to  
632 a new tube and centrifuged for 20 minutes at 28,000 x g at 4°C. The cleared lysate was  
633 mixed with 200 µL of glutathione agarose beads (Sigma-Aldrich, St. Louis, MO) and turned  
634 end-over-end for 1.5 hours at 4°C before being loaded into a gravity column. The column  
635 was washed with 60 volumes of lysis. Before elution, the beads were resuspended in 600  
636 µL lysis buffer, and 100 µL of the resulting 25% slurry was removed for use in on-bead  
637 kinase reactions. The beads were allowed to re-settle, and protein was eluted from the  
638 resulting column twice, using 175 µL of lysis buffer + 25 mM glutathione each time. The  
639 beads were incubated in elution buffer for 1 hour before the first elution and 1.5 hours  
640 before the second elution. Eluates were aliquoted and flash frozen.

641  
642 **Kinase assays using glutathione-agarose-bound kinase activity.** For each reaction  
643 using bead-bound kinase activity, 20 µL of the 25% glutathione-agarose slurry sampled  
644 above was centrifuged to give a 5 µL bead pellet. The supernatant was removed, and 5  
645 µL of 4x kinase buffer supplemented with radiolabeled ATP, 0.8 mg/mL BSA, and 100 nM  
646 Cks1 was added. The resulting 10 µL of 50% slurry was then mixed with 10 µL of substrate  
647 solution, as in the kinase assays described above. Tubes were agitated at regular intervals  
648 during kinase reactions to keep the beads in suspension, and samples were removed  
649 using cut pipet tips, to ensure bead capture.

650  
651 **Acknowledgements:** We thank Tim Stearns for Sf9 cells, Mike Tyers for baculovirus  
652 stocks, Jennifer Ewald, Kurt Schmoller, David Morgan, Steve Hahn, and Steve Buratowski  
653 for yeast strains. We thank Mart Loog, Jim Ferrell, Fred Cross, Peter Pryciak, Aseem  
654 Ansari, David Morgan, and Skotheim lab members for constructive feedback. We thank  
655 Ben Reyes Topacio for help with enzyme purifications. This work was supported by the  
656 NIH (GM092925 and GM115479), the HHMI-Simons (JMS Faculty Scholars Program),  
657 the HFSP (postdoctoral fellowship to MK), and the Life Sciences Research Foundation  
658 (Simons Foundation Fellowship to MS).

## Figure S1

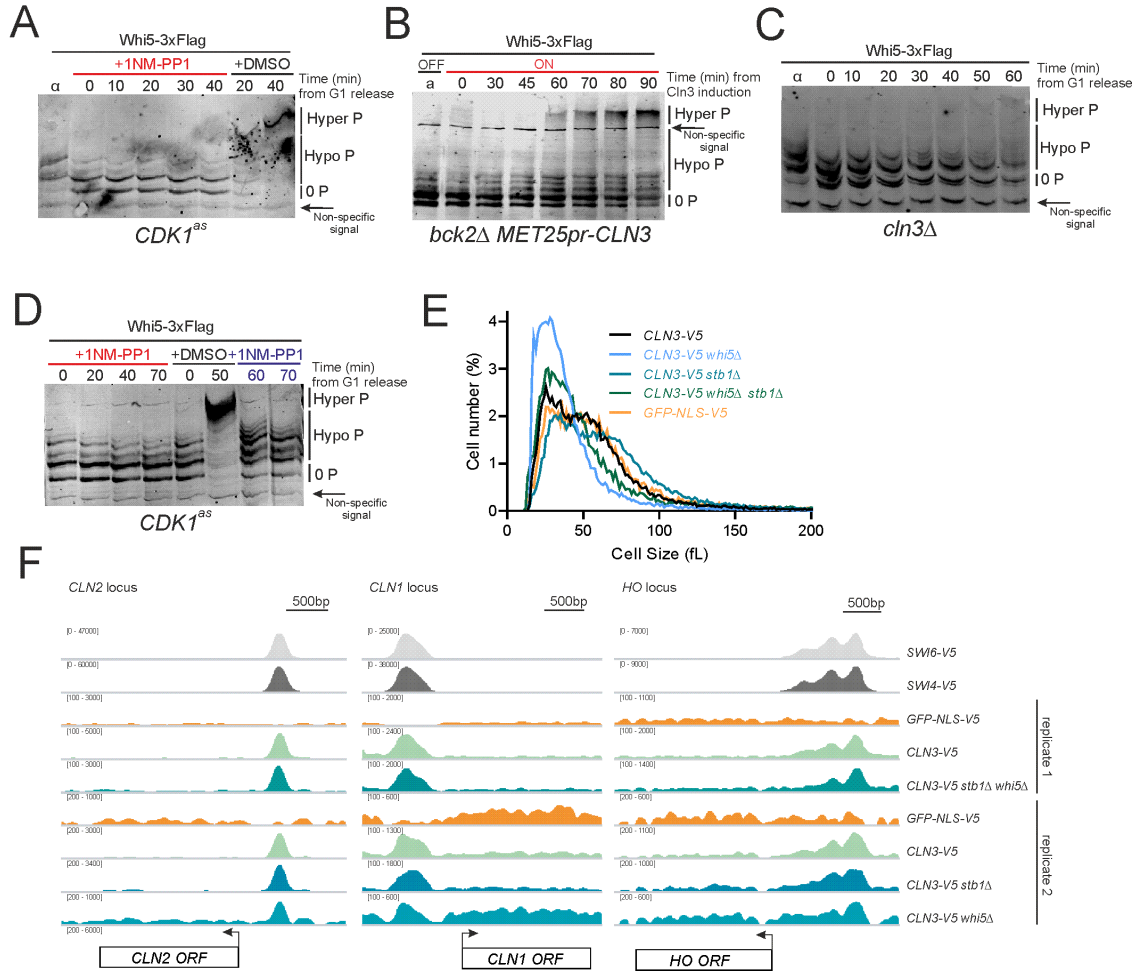

659

660

661 **Fig. S1.** (A) to (D) Phos-tag immunoblots measuring distinct hypo- and hyper-

662 phosphorylated isoforms of Whi5 C-terminally tagged with 3 Flag epitopes

663 expressed from the *WHI5* promoter (Whi5-3xFlag). (A) Whi5-3xFlag

664 phosphorylation time series in the ATP analog sensitive *CDK1<sup>as</sup>* strain. Cells were

665 released from pheromone-induced G1 arrest into media with DMSO or 10μM

666 of the ATP analog 1NM-PP1. (B) Whi5-3xFlag phosphorylation time series in a *bck2Δ*

667 *MET25pr-CLN3* strain. Cells arrested in G1 in the presence of methionine and then

668 were released into media without methionine. (C) Whi5-3xFlag phosphorylation

669 time series after *cln3Δ* cells were released from a pheromone-induced G1 arrest.

670 (D) Whi5-3xFlag phosphorylation time series in a *CDK1<sup>as</sup>* strain. Cells were

671 released from a pheromone-induced G1 arrest and then DMSO or 10μM 1NM-PP1

672 were added at 0 minutes when Whi5 was hypophosphorylated. In the case where

673 DMSO was initially added, we then also added 10μM 1NM-PP1 at 50 minutes

674 when Whi5 is hyperphosphorylated. (E) Cell size distributions measured by Coulter

675 counter for the strains used in the Cln3-V5 ChIP experiments used to generate the

676 data for Fig. 1E and fig. S1F. All strains were grown on synthetic complete media

677 +2% glycerol +1% ethanol. (F) ChIP-seq signal at three example SBF regulated

genes: *CLN2*, *CLN1* and *HO*. *CLN3*, *SWI4* or *SWI6* were tagged at the

678 endogenous loci with the V5 epitope and anti-V5 ChIP-seq was performed in the  
679 indicated genotypes as described in the methods. A subset of these data are also  
680 presented in Fig. 1E.

## Figure S2

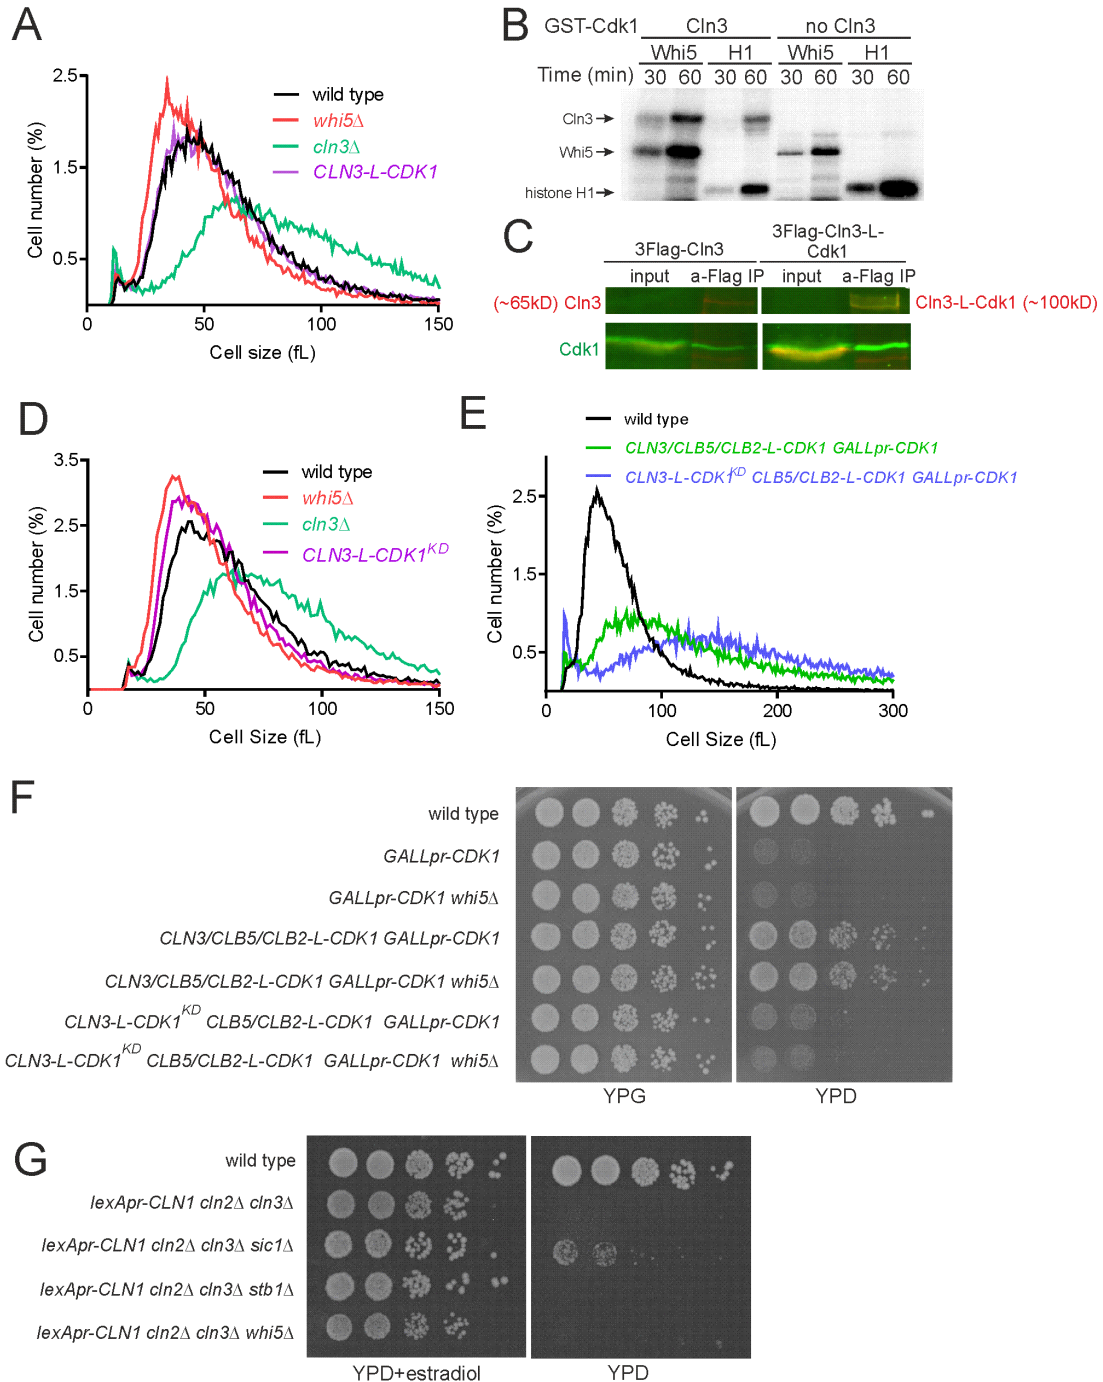

681

682

683

684

685

686

687

688

**Fig. S2. (A)** Cell size distributions measured by Coulter counter for the indicated genotypes. Cells were grown on synthetic complete media +2% glucose. **(B)** Autoradiographs of *in vitro* kinase assays using substrates Whi5 and histone H1. Kinase activity was purified from Sf9 insect cells expressing Cln3, Cks1 and Cdk1-GST (left) or only Cks1 and Cdk1-GST (right). The activity previously reported in (4) to be due to Cln3-Cdk1 in was present in the control purification without Cln3 expression as seen on the right-hand side panel (see methods). **(C)** Immunoblots



689 of samples following immunoprecipitation with 3xFlag-Cln3 or 3xFlag-Cln3-L-  
690 Cdk1<sup>KD</sup>, both expressed from the *GAL1* promoter. Both 3xFlag-Cln3 and 3xFlag-  
691 Cln3-L-Cdk1<sup>KD</sup> co-immunoprecipitated with endogenous Cdk1. **(D)** Cell size  
692 distributions, measured by Coulter counter, for the indicated genotypes. Cells were  
693 grown on synthetic complete media +2% glucose. **(E)** Cell size distributions,  
694 measured by Coulter counter, for the indicated genotypes. Cells were grown on  
695 synthetic complete media +2% galactose before adding 2% glucose to repress  
696 *GALL* promoter-dependent expression of Cdk1. Cell size was measured 12 hours  
697 after *GALLpr* repression. **(F)** Spot viability assays of WT and strains with *GALLpr*-  
698 dependent expression of Cdk1 on YPG (*GALLpr* ON) or YPD (*GALLpr* OFF).  
699 Adding three cyclin-Cdk1 fusion genes rescues *GALLpr-CDK1* repression.  
700 However, if *CLN3-CDK1* is replaced with a kinase dead *CLN3-CDK1<sup>KD</sup>* fusion,  
701 cells are not viable even if *WHI5* is deleted. **(G)** Spot viability assays of WT and  
702 strains where G1 is driven exclusively by the hormone responsive promoter  
703 (*LexApr*) expressing *CLN1* on YPD + 50nM Beta-estradiol (*LexApr* ON) or YPD  
704 (*LexApr* OFF). Deletion of *SIC1*, but not *whi5* $\Delta$  or *stb1* $\Delta$  restores viability.

## Figure S3

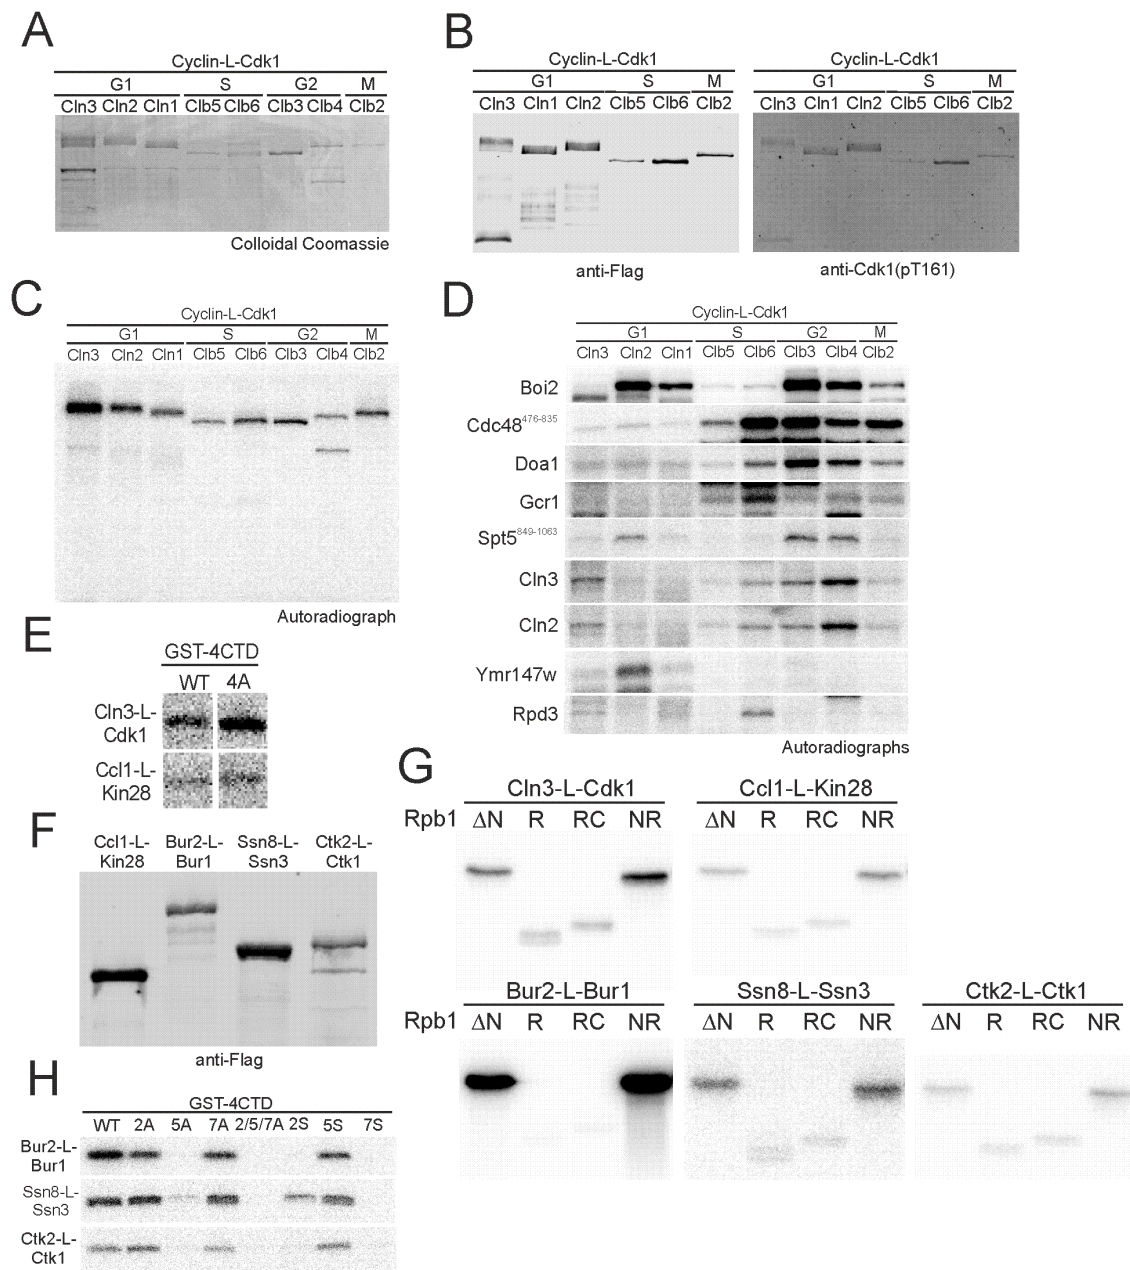

705

706

707

708

709

710

711

712

713

714

715

**Fig. S3.** (A) Colloidal Coomassie-stained SDS gel of all purified cyclin-L-Cdk1 preparations used in this study. (B) Immunoblots to determine the levels (anti-FLAG) and activating phosphorylation (anti-Cdk1 pT169) of the indicated purified cyclin-L-Cdk1 complexes used in this study. (C) Autoradiographs of *in vitro* kinase assays using the indicated purified cyclin-L-Cdk1 complexes without any substrate protein. The signal is due to autophosphorylation. (D) Autoradiographs of *in vitro* kinase assays using equal amounts of the denoted cyclin-L-Cdk1 and candidate Cln3-Cdk1 substrates. (E) Autoradiographs of *in vitro* kinase assays using Cln3-L-Cdk1 and Ccl1-L-Kin28 to phosphorylate a synthetic substrate containing 4 CTD repeats or 4 CTD repeats with threonine 4 mutated to alanine. (F) Immunoblots to

716 determine the levels (anti-FLAG) of purified transcriptional cyclin-L-Cdk complexes  
717 used in this study. **(G)** Autoradiographs of *in vitro* kinase assays with transcriptional  
718 cyclin-L-Cdk complexes phosphorylating Rpb1 $\Delta$ N and a series of Rpb1 $\Delta$ N  
719 truncations. See Fig. 3E for details of truncations. **(H)** Autoradiographs of *in vitro*  
720 kinase assays using Cln3-L-Cdk1 or transcriptional cyclin-L-Cdks to phosphorylate  
721 WT or mutant versions of 4 CTD repeats. See Fig. 3F for details of CTD repeat  
722 variants.

## Figure S4

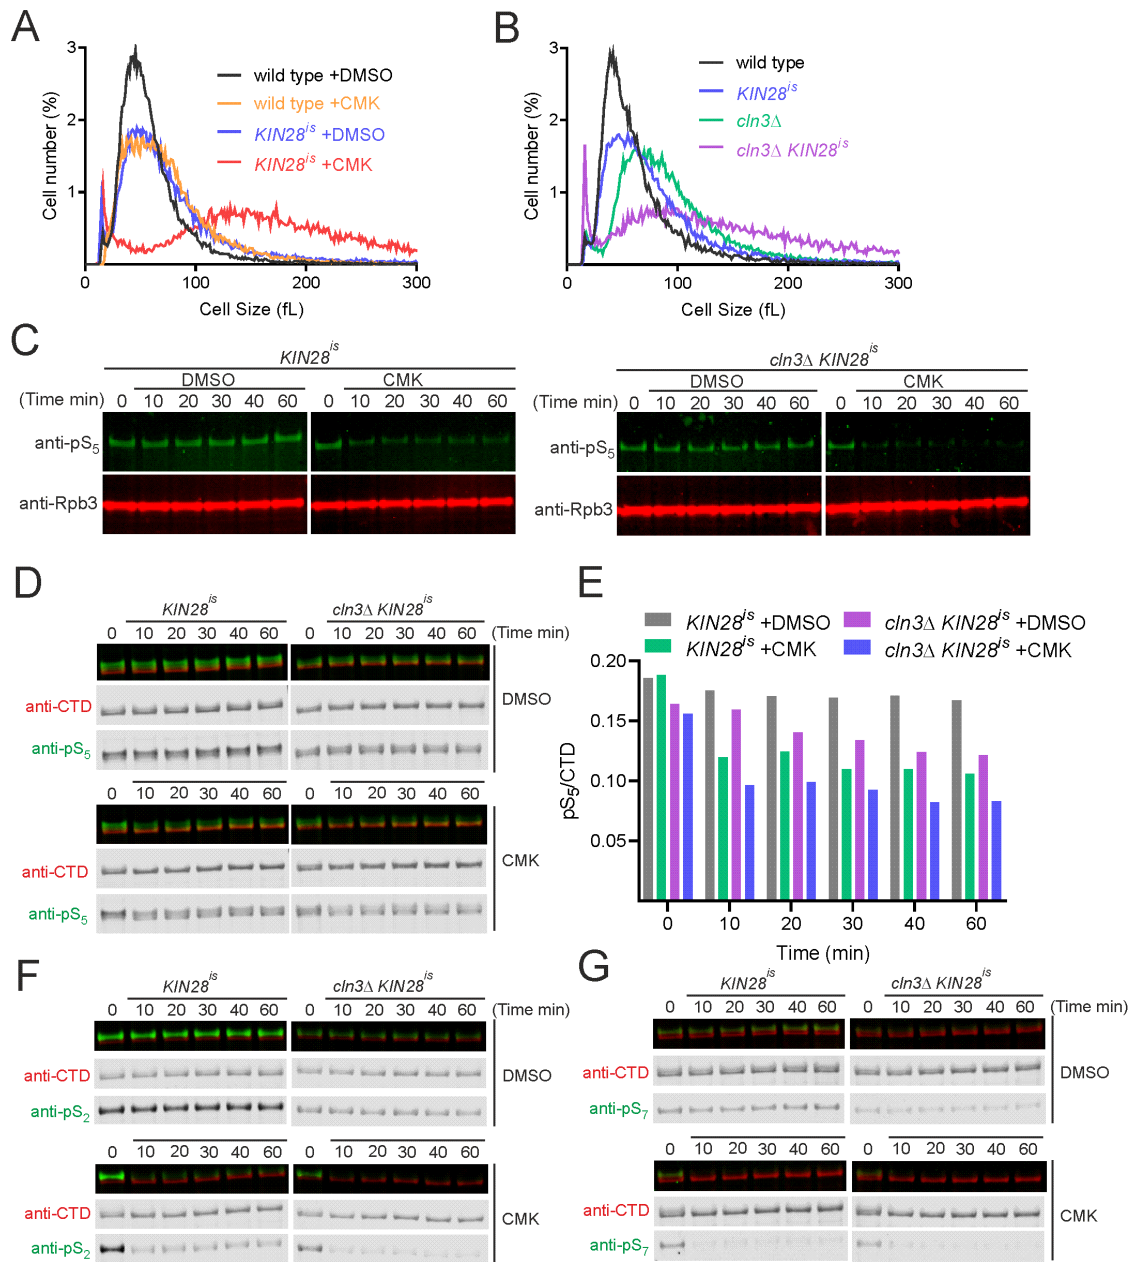

723

724

725

726

727

728

729

730

731

732

733

734

**Fig. S4.** (A) Cell size distributions measured by Coulter counter for the indicated genotypes. All strains were grown on synthetic complete media +2% glucose with 5μM CMK or DMSO. (B) Cell size distributions measured by Coulter counter for the indicated genotypes. All strains were grown on synthetic complete media +2% glucose. (C) to (G) Immunoblots and quantifications of different phosphorylated forms of Rpb1 in *KIN28<sup>is</sup>* or *KIN28<sup>is</sup> cln3Δ* strains at the indicated timepoints after release from G1 pheromone arrest into DMSO or 5μM CMK. *Kin28<sup>is</sup>* contains an active site mutant rendering it sensitive to covalent inhibition by the small molecule CMK. (C) Immunoblots of total cellular phosphorylated Rpb1-CTD S<sub>5</sub> (H14 antibody) and total cellular RNA polymerase II (Rpb3) after release from G1

735 pheromone arrest into DMSO or 5 $\mu$ M CMK. A subset of these data are also  
736 presented in Fig. 3K. **(D)** Immunoblots of total cellular phosphorylated Rpb1-CTD  
737 S<sub>5</sub> (3E8 antibody) and Rpb1-CTD (8wG16 antibody) after release from G1  
738 pheromone arrest into DMSO or 5 $\mu$ M CMK. **(E)** Quantification of immunoblots in  
739 (D): total cellular phosphorylated CTD S<sub>5</sub> (3E8 antibody) normalized to Rpb1-CTD  
740 (8wG16 antibody). **(F)** Immunoblots of total cellular phosphorylated Rpb1-CTD S<sub>2</sub>  
741 (3E10 antibody) and Rpb1-CTD (8wG16 antibody) after release from G1  
742 pheromone arrest into DMSO or 5 $\mu$ M CMK. **(G)** Immunoblots of total cellular  
743 phosphorylated Rpb1-CTD S<sub>7</sub> (3E12 antibody) and Rpb1-CTD (8wG16 antibody)  
744 after release from G1 pheromone arrest into DMSO or 5 $\mu$ M CMK.



## Figure S5

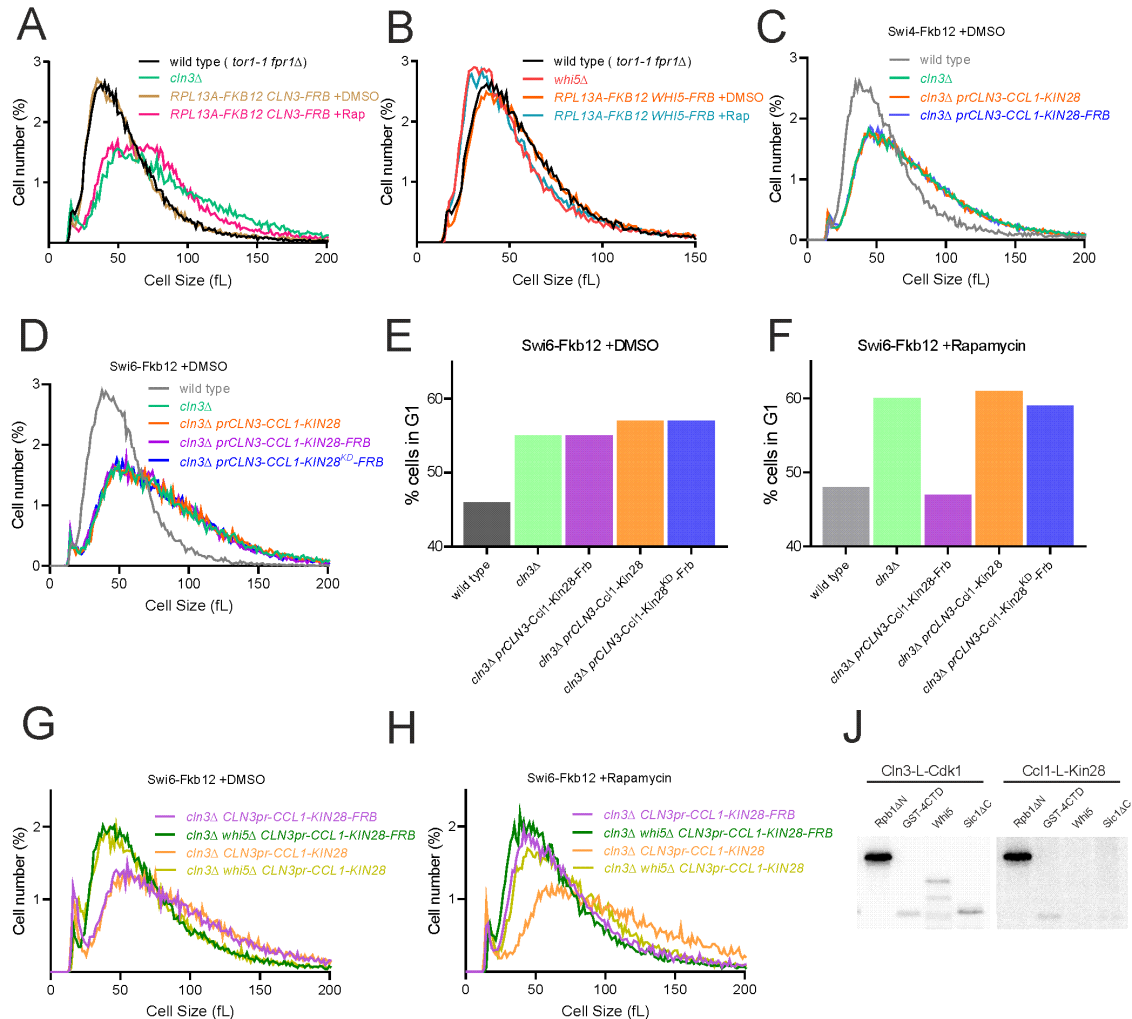

745

746

**Fig. S5. (A) to (B)** Cell size distributions measured by Coulter counter for the

indicated genotypes. All strains were grown on synthetic complete media +2%

glucose. 1μg/ml rapamycin or DMSO was added ~200 minutes before cell size

measurements. **(C) to (H)** Conditional recruitment of Ccl1-L-Kin28 to SBF using

the rapamycin inducible binding system. Ccl1-L-Kin28 fusion proteins were

expressed from a genomically integrated copy of the *CLN3* promoter. Ccl1-L-

Kin28-FRB was recruited to SBF via its Swi4 (C&G) or Swi6 (D to F & H) subunits

upon rapamycin treatment. Ccl1-L-Kin28 lacking FRB is not recruited. All strains

were grown on synthetic complete media +2% glucose with 1μg/ml rapamycin or

DMSO. **(C) to (D)** Cell size distributions measured by Coulter counter for the

indicated genotypes. **(E) to (F)** Quantification of flow cytometry analysis of DNA

content of the cells in (D) and Fig. 5D. Samples were collected from the same

cultures at the same time for both cell size and DNA content measurements. **(G)**

to **(H)** Cell size distributions measured using a Coulter counter for the indicated

genotypes. **(J)** Autoradiographs of *in vitro* phosphorylation of Rpb1ΔN, GST-

760

761 4CTD, Whi5 or Sic1 $\Delta$ C by Cln3-L-Cdk1 or Ccl1-L-Kin28. Ccl1-L-Kin28 is not able  
762 to phosphorylate Whi5.

763 **REFERENCES**

764

765

766 1. C. Bertoli, J. M. Skotheim, R. A. M. de Bruin, Control of cell cycle transcription  
767 during G1 and S phases. *Nature Reviews Molecular Cell Biology*. **14**, 518–528  
768 (2013).

769 2. D. O. Morgan, *The Cell Cycle* (London, 2007).

770 3. R. A. M. de Bruin, W. H. McDonald, T. I. Kalashnikova, J. Yates, C. Wittenberg,  
771 Cln3 activates G1-specific transcription via phosphorylation of the SBF bound  
772 repressor Whi5. *Cell*. **117**, 887–898 (2004).

773 4. M. Costanzo *et al.*, CDK activity antagonizes Whi5, an inhibitor of G1/S  
774 transcription in yeast. *Cell*. **117**, 899–913 (2004).

775 5. A. Doncic, M. Falleur-Fettig, J. M. Skotheim, Distinct Interactions Select and  
776 Maintain a Specific Cell Fate. *Mol Cell*. **43**, 528–539 (2011).

777 6. J. M. Skotheim, S. Di Talia, E. D. Siggia, F. R. Cross, Positive feedback of G1  
778 cyclins ensures coherent cell cycle entry. *Nature*. **454**, 291–296 (2008).

779 7. M. Tyers, G. Tokiwa, B. Futcher, Comparison of the *Saccharomyces cerevisiae*  
780 G1 cyclins: Cln3 may be an upstream activator of Cln1, Cln2 and other cyclins.  
781 *The EMBO Journal*. **12**, 1955–1968 (1993).

782 8. H. Wang, L. B. Carey, Y. Cai, H. Wijnen, B. Futcher, Recruitment of Cln3 Cyclin to  
783 Promoters Controls Cell Cycle Entry via Histone Deacetylase and Other Targets.  
784 *PLoS Biol*. **7**, e1000189 (2009).

785 9. J. L. Corden, RNA polymerase II C-terminal domain: Tethering transcription to  
786 transcript and template. *Chemical Reviews*. **113**, 8423–8455 (2013).

787 10. C. Schwarz *et al.*, A Precise Cdk Activity Threshold Determines Passage through  
788 the Restriction Point. *Mol Cell*. **69**, 253–264.e5 (2018).

789 11. S. L. Spencer *et al.*, The proliferation-quiescence decision is controlled by a  
790 bifurcation in CDK2 activity at mitotic exit. *Cell*. **155**, 369–383 (2013).

791 12. S. D. Cappell, M. Chung, A. Jaimovich, S. L. Spencer, T. Meyer, Irreversible  
792 APC(Cdh1) Inactivation Underlies the Point of No Return for Cell-Cycle Entry.  
793 *Cell*. **166**, 167–180 (2016).

794 13. A. B. Pardee, G1 events and regulation of cell proliferation. *Science*. **246**, 603–  
795 608 (1989).

796 14. G. Yao, T. J. Lee, S. Mori, J. R. Nevins, L. You, A bistable Rb-E2F switch  
797 underlies the restriction point. *Nat Cell Biol*. **10**, 476–482 (2008).

798 15. C. J. Sherr, The Pezcoller lecture: cancer cell cycles revisited. *Cancer Res*. **60**,  
799 3689–3695 (2000).

- 800 16. A. M. Narasimha *et al.*, Cyclin D activates the Rb tumor suppressor by mono-  
801 phosphorylation. *Elife*. **3**, e02872 (2014).
- 802 17. B. R. Topacio *et al.*, Cyclin D-Cdk4,6 Drives Cell-Cycle Progression via the  
803 Retinoblastoma Protein's C-Terminal Helix. *Mol Cell*. **74**, 758–770.e4 (2019).
- 804 18. E. Kinoshita, E. Kinoshita-Kikuta, K. Takiyama, T. Koike, Phosphate-binding tag, a  
805 new tool to visualize phosphorylated proteins. *Mol. Cell Proteomics*. **5**, 749–757  
806 (2006).
- 807 19. S. Bhaduri *et al.*, A docking interface in the cyclin Cln2 promotes multi-site  
808 phosphorylation of substrates and timely cell-cycle entry. *Curr Biol*. **25**, 316–325  
809 (2015).
- 810 20. K. M. Schmoller, J. J. Turner, M. Kõivomägi, J. M. Skotheim, Dilution of the cell  
811 cycle inhibitor Whi5 controls budding-yeast cell size. *Nature*. **526**, 268–272  
812 (2015).
- 813 21. R. Nash, G. Tokiwa, S. Anand, K. Erickson, A. B. Futcher, The WHI1+ gene of  
814 *Saccharomyces cerevisiae* tethers cell division to cell size and is a cyclin  
815 homolog. *The EMBO Journal*. **7**, 4335–4346 (1988).
- 816 22. F. R. Cross, DAF1, a mutant gene affecting size control, pheromone arrest, and  
817 cell cycle kinetics of *Saccharomyces cerevisiae*. *Molecular and cellular biology*. **8**,  
818 4675–4684 (1988).
- 819 23. D. Coudreuse, P. Nurse, Driving the cell cycle with a minimal CDK control  
820 network. *Nature*. **468**, 1074–1079 (2010).
- 821 24. R. N. Rao *et al.*, Conditional transformation of rat embryo fibroblast cells by a  
822 cyclin D1-cdk4 fusion gene. *Oncogene*. **18**, 6343–6356 (1999).
- 823 25. R. A. M. de Bruin, T. I. Kalashnikova, C. Wittenberg, Stb1 collaborates with other  
824 regulators to modulate the G1-specific transcriptional circuit. *Molecular and  
825 cellular biology*. **28**, 6919–6928 (2008).
- 826 26. M. Ashe *et al.*, The SBF- and MBF-associated protein Msa1 is required for proper  
827 timing of G1-specific transcription in *Saccharomyces cerevisiae*. *J Biol Chem*.  
828 **283**, 6040–6049 (2008).
- 829 27. S. Miles, M. W. Croxford, A. P. Abeysinghe, L. L. Breeden, Msa1 and Msa2  
830 Modulate G1-Specific Transcription to Promote G1 Arrest and the Transition to  
831 Quiescence in Budding Yeast. *PLoS Genet*. **12**, e1006088 (2016).
- 832 28. H. Wijnen, A. Landman, B. Futcher, The G(1) cyclin Cln3 promotes cell cycle  
833 entry via the transcription factor Swi6. *Molecular and cellular biology*. **22**, 4402–  
834 4418 (2002).
- 835 29. L. Kao *et al.*, Global analysis of cdc14 dephosphorylation sites reveals essential  
836 regulatory role in mitosis and cytokinesis. - PubMed - NCBI. *Mol. Cell Proteomics*.  
837 **13**, 594–605 (2014).

- 838 30. M. E. Miller, F. R. Cross, A. L. Groeger, K. L. Jameson, Identification of novel and  
839 conserved functional and structural elements of the G1 cyclin Cln3 important for  
840 interactions with the CDK Cdc28 in *Saccharomyces cerevisiae*. *Yeast*. **22**, 1021–  
841 1036 (2005).
- 842 31. M. Kõivomägi *et al.*, Dynamics of Cdk1 Substrate Specificity during the Cell Cycle.  
843 *Mol Cell*. **42**, 610–623 (2011).
- 844 32. K. M. Harlen, L. S. Churchman, The code and beyond: transcription regulation by  
845 the RNA polymerase II carboxy-terminal domain. *Nature Reviews Molecular Cell*  
846 *Biology*. **18**, 263–273 (2017).
- 847 33. J.-P. Hsin, J. L. Manley, The RNA polymerase II CTD coordinates transcription  
848 and RNA processing. *Genes & development*. **26**, 2119–2137 (2012).
- 849 34. Y. Chun *et al.*, Selective kinase inhibition shows that Bur1 (Cdk9) phosphorylates  
850 the Rpb1 linker in vivo. *Molecular and cellular biology*. **39**, 395 (2019).
- 851 35. P. Chymkowitch *et al.*, Cdc28 kinase activity regulates the basal transcription  
852 machinery at a subset of genes. *Proc Natl Acad Sci USA*. **109**, 10450–10455  
853 (2012).
- 854 36. J. B. Rodríguez-Molina, S. C. Tseng, S. P. Simonett, J. Taunton, A. Z. Ansari,  
855 Engineered Covalent Inactivation of TFIIH-Kinase Reveals an Elongation  
856 Checkpoint and Results in Widespread mRNA Stabilization. *Mol Cell*. **63**, 433–  
857 444 (2016).
- 858 37. H. Haruki, J. Nishikawa, U. K. Laemmli, The anchor-away technique: rapid,  
859 conditional establishment of yeast mutant phenotypes. *Mol Cell*. **31**, 925–932  
860 (2008).
- 861 38. Y. Qu *et al.*, Cell Cycle Inhibitor Whi5 Records Environmental Information to  
862 Coordinate Growth and Division in Yeast. *Cell Rep*. **29**, 987–994.e5 (2019).
- 863 39. G. Tokiwa, M. Tyers, T. Volpe, B. Futcher, Inhibition of G1 cyclin activity by the  
864 Ras/cAMP pathway in yeast. *Nature*. **371**, 342–345 (1994).
- 865 40. M. D. Baroni, P. Monti, L. Alberghina, Repression of growth-regulated G1 cyclin  
866 expression by cyclic AMP in budding yeast. *Nature*. **371**, 339–342 (1994).
- 867 41. M. Polymenis, E. V. Schmidt, Coupling of cell division to cell growth by  
868 translational control of the G1 cyclin CLN3 in yeast. *Genes & development*. **11**,  
869 2522–2531 (1997).
- 870 42. X. Liu *et al.*, Reliable cell cycle commitment in budding yeast is ensured by signal  
871 integration. *Elife*. **4**, e03977 (2015).
- 872 43. R. Lucena *et al.*, Cell Size and Growth Rate Are Modulated by TORC2-Dependent  
873 Signals. *Curr Biol*. **28**, 196–210.e4 (2018).



- 874 44. E. M. Medina, J. J. Turner, R. Gordân, J. M. Skotheim, N. E. Buchler, Punctuated  
875 evolution and transitional hybrid network in an ancestral cell cycle of fungi. *Elife*.  
876 **5**, 120 (2016).
- 877 45. L. Cao *et al.*, Phylogenetic analysis of CDK and cyclin proteins in premetazoan  
878 lineages. *BMC Evol Biol.* **14**, 1–16 (2014).
- 879 46. D. Hermand *et al.*, Specificity of Cdk activation in vivo by the two Caks Mcs6 and  
880 Csk1 in fission yeast. *The EMBO Journal.* **20**, 82–90 (2001).
- 881 47. S. Laroche, J. Pandur, R. P. Fisher, H. K. Salz, B. Suter, Cdk7 is essential for  
882 mitosis and for in vivo Cdk-activating kinase activity. *Genes & development.* **12**,  
883 370–381 (1998).
- 884 48. S. Laroche *et al.*, Requirements for Cdk7 in the assembly of Cdk1/cyclin B and  
885 activation of Cdk2 revealed by chemical genetics in human cells. *Mol Cell.* **25**,  
886 839–850 (2007).
- 887 49. L. J. Cisek, J. L. Corden, Phosphorylation of RNA polymerase by the murine  
888 homologue of the cell-cycle control protein cdc2. *Nature.* **339**, 679–684 (1989).
- 889 50. J. C. Ewald, A. Kuehne, N. Zamboni, J. M. Skotheim, The Yeast Cyclin-Dependent  
890 Kinase Routes Carbon Fluxes to Fuel Cell Cycle Progression. *Mol Cell.* **62**, 532–  
891 545 (2016).
- 892 51. M. Kõivomägi *et al.*, Cascades of multisite phosphorylation control Sic1  
893 destruction at the onset of S phase. *Nature.* **480**, 128–131 (2011).
- 894 52. B. Hu *et al.*, Biological chromodynamics: a general method for measuring protein  
895 occupancy across the genome by calibrating ChIP-seq. *Nucleic Acids Res.* **43**,  
896 e132 (2015).
- 897 53. D. McCusker *et al.*, Cdk1 coordinates cell-surface growth with the cell cycle. *Nat*  
898 *Cell Biol.* **9**, 506–515 (2007).
- 899 54. G. J. Reynard, W. Reynolds, R. Verma, R. J. Deshaies, Cks1 is required for G(1)  
900 cyclin-cyclin-dependent kinase activity in budding yeast. *Molecular and cellular*  
901 *biology.* **20**, 5858–5864 (2000).
- 902 55. D. Skowyra, K. L. Craig, M. Tyers, S. J. Elledge, J. W. Harper, F-Box Proteins Are  
903 Receptors that Recruit Phosphorylated Substrates to the SCF Ubiquitin-Ligase  
904 Complex. *Cell.* **91**, 209–219 (1997).
- 905
